# Supplementary material for: Use of IMMPACT domains in clinical trials of acupuncture for chronic pain: a protocol for a methodological survey
Source: PubMed Central journal article supplement — BMJ Open. 2017 Sep 27;7(9):e014904. doi: 10.1136/bmjopen-2016-014904 (PMC5623415; doi:10.1136/bmjopen-2016-014904), 2017-09-27
Supplement: bmjopen-2016-014904.draft_revisions.pdf [file bmjopen-2016-014904.draft_revisions.pdf]

# BMJ Open

BMJ Open is committed to open peer review. As part of this commitment we make the peer review history of every article we publish publicly available.

When an article is published we post the peer reviewers' comments and the authors' responses online. We also post the versions of the paper that were used during peer review. These are the versions that the peer review comments apply to.

The versions of the paper that follow are the versions that were submitted during the peer review process. They are not the versions of record or the final published versions. They should not be cited or distributed as the published version of this manuscript.

BMJ Open is an open access journal and the full, final, typeset and author-corrected version of record of the manuscript is available on our site with no access controls, subscription charges or pay-per-view fees (<http://bmjopen.bmj.com>).

If you have any questions on BMJ Open's open peer review process please email [editorial.bmjopen@bmj.com](mailto:editorial.bmjopen@bmj.com)

# BMJ Open

## USE OF IMPACT DOMAINS IN CLINICAL TRIALS OF ACUPUNCTURE FOR CHRONIC PAIN: A PROTOCOL FOR A METHODOLOGICAL SURVEY

|                                 |                                                                                                                                                                                                                                                                                             |
|---------------------------------|---------------------------------------------------------------------------------------------------------------------------------------------------------------------------------------------------------------------------------------------------------------------------------------------|
| Journal:                        | <i>BMJ Open</i>                                                                                                                                                                                                                                                                             |
| Manuscript ID                   | bmjopen-2016-014904                                                                                                                                                                                                                                                                         |
| Article Type:                   | Protocol                                                                                                                                                                                                                                                                                    |
| Date Submitted by the Author:   | 25-Oct-2016                                                                                                                                                                                                                                                                                 |
| Complete List of Authors:       | Mazzei, Lauren; Universidade de Sorocaba, Programa de Pós-Graduação em Ciências Farmacêuticas<br>Bergamaschi, Cristiane; University of Sorocaba, Pharmaceutical Science<br>Silva, Marcus; Federal University of Amazonas, Clinical Epidemiology<br>Lopes, Luciane; UNISO, Pharmacie Science |
| <b>Primary Subject Heading</b>: | Research methods                                                                                                                                                                                                                                                                            |
| Secondary Subject Heading:      | Complementary medicine, Evidence based practice                                                                                                                                                                                                                                             |
| Keywords:                       | Acupuncture, Chronic Pain, Methodological Survey                                                                                                                                                                                                                                            |
|                                 |                                                                                                                                                                                                                                                                                             |

SCHOLARONE™  
Manuscripts

1  
2  
3  
4 **USE OF IMPACT DOMAINS IN CLINICAL TRIALS OF ACUPUNCTURE FOR**  
5 **CHRONIC PAIN: A PROTOCOL FOR A METHODOLOGICAL SURVEY**  
6  
7

8 **Authors:** Lauren Giusti Mazzei<sup>1</sup>, Cristiane de Cássia Bergamaschi<sup>1</sup>, Marcus Tolentino  
9 Silva<sup>1</sup>, Luciane Cruz Lopes<sup>1</sup>  
10

11 **Author affiliations**

12 <sup>1</sup> Pharmaceutical Sciences Graduate Program, University of Sorocaba, Sorocaba, State of São  
13 Paulo, Brazil  
14

15 Email address:

16 Lauren Giusti Mazzei [laurengmazzei@hotmail.com](mailto:laurengmazzei@hotmail.com)

17 Cristiane de Cássia Bergamaschi [cristiane.motta@prof.uniso.br](mailto:cristiane.motta@prof.uniso.br)

18 Marcus Tolentino Silva [marcusts@gmail.com](mailto:marcusts@gmail.com)

19 Luciane Cruz Lopes [luslopes@terra.com.br](mailto:luslopes@terra.com.br)  
20  
21  
22

23 Corresponding author:

24 Luciane Cruz Lopes

25 Universidade de Sorocaba - UNISO

26 Rodovia Raposo Tavares, km 92.5, 18023-000

27 Sorocaba – SP, Brasil

28 Phone/Fax (15) 2101-7104  
29

30 2577 words  
31  
32  
33  
34  
35  
36  
37  
38  
39  
40  
41  
42  
43  
44  
45  
46  
47  
48  
49  
50  
51  
52  
53  
54  
55  
56  
57  
58  
59  
60

## SUMMARY

**INTRODUCTION:** Pain is one of the most common and most debilitating complaints among patients. They affect the individual, their relationship with friends and family, their work force, and their sociability. Acupuncture is one of the therapeutic resources for managing chronic pain. Given the variability of outcome measures in Controlled Randomized Clinical Trials on Non-Oncologic Chronic Pain (CRCT-NOCP), the Initiative in Methods, Measurements and Pain Assessment in Clinical Trials (IMPACT) recommends six domains to be covered in evaluating the effectiveness of treatments for chronic pain.

**OBJECTIVE:** The main objective of this study is to check whether researchers have used IMPACT recommendations in measuring CRCT-NOCP outcomes when acupuncture was used as a treatment.

**METHOD:** This is a methodological study. We will systematically search for eligible studies in specific database with a defined strategy. We are to use terms of MeSH “acupuncture”, “chronic pain” and its similar terms, without idiom restrictions. Eligible studies include those which randomized and chose NOCP patients to be treated with acupuncture or control (sham acupuncture or no acupuncture), recruited after September 2004, number of patients equal or less than 100. The measured outcomes are to be the presence of outcome domains recommended by IMPACT, domains reported by patient or clinician, tools used to measure such domains, besides other features of the studies. We shall conduct a regression analysis to explore factors which can be associated with the presence of outcome domains according to IMPACT recommendations.

**ETHICS AND DISSEMINATION:** This survey will be submitted to presentation in congresses and publishing in a scientific journal. The evidence obtained in this study will allow us to measure the quality of the evidence and greater transparency in decisions regarding the use of acupuncture as a viable alternative to managing chronic pain.

**Keywords:** Acupuncture. Chronic Pain. Methodological Survey.

### Strong Points and Limitations of this Study

- ✓ This is the first study to evaluate the outcome domains used in CRCT using acupuncture as intervention to the treatment of NOCP.
- ✓ Acupuncture can be an effective therapy in chronic pain control, avoiding costly expenses with analgesic medication which generate dependence (opioids), or limiting adverse effects as in the case of non-steroid anti-inflammatories (gastric ulcer and

1  
2  
3  
4 cardiovascular events) that have a direct impact in the patient's life. Therefore,  
5 checking compliance with IMMPACT recommendations in CRCT about NOCP may  
6 appraise the quality of the evidence and provide greater transparency in decisions  
7 regarding the use of acupuncture as a viable alternative in this clinical condition. It can  
8 also guide physicians in clinical practice decision making.  
9

- 10 ✓ The methods contain explicit eligibility criteria, a comprehensive research and a  
11 double independent selection, including independent appraisal of bias risk.
- 12 ✓ Primary studies are probably limited in conception and outcome measures and thus,  
13 they have high bias risk. Besides, techniques or point categories used in acupuncture  
14 may be uncertain or varied in different studies.
- 15 ✓ This enquiry has not received any specific sponsorship from any public, private or  
16 non-profit agency.  
17  
18  
19  
20  
21  
22  
23  
24  
25  
26  
27

## 28 INTRODUCTION

29  
30 Non-Oncologic Chronic Pain (NOCP) is defined as a persisting painful feeling for  
31 more than some months, which may be associated to traumas and illnesses [1] or not. It is  
32 estimated that 18,9% of the world population present chronic pain. It is one of the most  
33 common complaints among patients, affecting not only the subject in their individuality, but  
34 also in a general way [2].  
35  
36  
37

38  
39 It is regarded as a health problem that consumes 22% of primary health appointments  
40 on average. In the United States, costs with pain medication are around US\$17,8 billion a year  
41 [3]. The Canadian project STOP-PAIN published the average cost of \$ 1,462 per individual  
42 monthly with chronic pain on waiting lists for multidisciplinary pain treatment facilities. [4]A  
43 recent population-based study with a subsample of 562 individuals out of a total of 5,094  
44 Portuguese adults with chronic pain identified a cost of € 1,883.30 per individual, totalling  
45 €4,611.69 million in the country in 2010 [5].  
46  
47  
48  
49

50  
51 Despite research efforts to understand molecular biology and nociceptive transmission  
52 pathways related to pain resulting in significant advances in pain treatment and better quality  
53 of life for patients, the efficacy assessment of certain therapies for managing such condition is  
54 below standard [1].  
55  
56

57  
58 Acupuncture is one of the resources that compose the National Policy of Integrated  
59 and Supplementary Practices (NPISP) IN Brazil. It is a possible therapy in managing chronic  
60

1  
2  
3  
4 pain with sensitive cost reduction to the government and adverse effect reduction to the  
5 patient [7]. However, we still find unprepared managers for implementing this policy in the  
6 public health system in Brazil nowadays (SUS) [8].  
7  
8

9 In such scenario, the World Health Organization (WHO) has launched a strategy for  
10 the period 2014-2023 to integrate to traditional medicine and supplement the health system in  
11 a safe, respectful, accessible and effective way. The aim of the document was to pinpoint  
12 challenges in the implementation, present possible strategies to solve them and stimulate the  
13 design of serious policies. The base references for elaborating the document are mainly  
14 guidelines and strategies developed by the organization [9].  
15  
16  
17  
18

19 The search for international guidelines approaching the use of acupuncture for NOCP  
20 in the adult population results in few findings or in conflicting recommendations.  
21 Acupuncture is recommended as an adjunct to conventional treatment of NOCP, but only the  
22 American guidelines specify the moment in which it should be used within the conventional  
23 drug treatment flow [2 10-12].  
24  
25  
26

27 Among the policies we looked up, the recommendation of acupuncture for many  
28 painful conditions is based on low quality evidence due to the diversity in the methodology of  
29 CRCT [2 10-12]. Besides this, such guidelines do not discriminate the power of the  
30 recommendation, except for those in Scotland and Canada [2 12].  
31  
32  
33

34 A systematic review of thirteen CRCT assessed the analgesic effects of acupuncture as  
35 compared to sham acupuncture in adult patients with chronic pain in conditions of knee  
36 osteoarthritis, tension headache, migraine, low back pain, fibromyalgia, abdominal pain in  
37 scar, postoperative and procedural pain due to colonoscopy. The outcomes showed analgesic  
38 effect without clinical relevance, in favor of acupuncture [13].  
39  
40  
41

42 Even showing quality, CRCT with adequate randomization and blinding may not  
43 provide the best approach for the development of strong evidence base for managing pain, in  
44 case the outcomes and its tools are not adequate [14]. Such limitations have been recognized  
45 internationally, leading to the development of the Initiative on Methods, Measurements and  
46 Pain Assessment in Clinical Trials (IMMPACT) in 2002.  
47  
48  
49

50 The initiative gathered 27 experts from universities, governmental agencies and  
51 pharmaceutical industry, who identified consensually a nucleus of six outcome domains that  
52 should be considered in CRCT for chronic pain [15]. The outcome domains considered were:  
53 (1) pain; (2) physical function; (3) emotional state; (4) evaluation of the participants regarding  
54 improvement and satisfaction with treatment; (5) adverse symptoms; and (6) the participant's  
55 willingness [16].  
56  
57  
58  
59  
60

1  
2  
3  
4 The establishment of a standard set of outcome domains in CRCT about chronic pain  
5 encourages researchers to consider chronic pain as a complex phenomenon which affects  
6 patients in multiple dimensions. It protects against the polarization of selective outcomes, a  
7 common problem in all medical literature. It makes systematic reviews and Meta analyses  
8 easier, which allows researchers to generate more precise estimations of treatment effects due  
9 to sharing common outcomes of individual trials [17].  
10  
11  
12  
13

14 Variability in outcome measures in CRCT about NOCP generates inaccuracies in the  
15 effectiveness of certain treatments. Although the recommendation of IMMPACT was  
16 published in 2003 and updated in 2008, there is no information on whether subsequent  
17 clinical trials published comply with IMMPACT recommendations on their outcome  
18 measures.  
19  
20  
21

22 The general aim of this project is to verify changes occurred in the way of reporting  
23 and assessing outcomes after the publication of IMMPACT recommendations in CRCT about  
24 the use of acupuncture in patients with NOCP.  
25  
26  
27

## 28 **METHODS**

### 29 **Study Design**

30  
31  
32 The study comprises a methodological survey of randomized clinical trials which used  
33 acupuncture for the treatment of chronic pain [18]. The methodological survey is a type of  
34 study on method enquiry, with data collection from selected CRCT, not based on  
35 questionnaires but using systematic methods in its execution.  
36  
37  
38  
39  
40

### 41 **Reference Sources and Search**

42  
43  
44  
45 All trials to be included are CRCT-NOCP selected in the systematic review carried out  
46 by Vickers et al. [18]. Trials comply with the latest review published on the theme, where  
47 authors carried out meta-analysis of individual data. Additional research is to be performed in  
48 studies dating as from June 2010 and 6 months before the systematic review of the  
49 comprehensive search date on the theme (considering delay in indexing). The search for  
50 eligible studies will be accomplished by systematic research of database, namely Lilacs,  
51 CINAHL, EMBASE, MEDLINE, AMED, Web of Science, Clinical Trials and Cochrane  
52 Central Registry of Controlled Trials, with a defined search strategy, free of idiom restriction.  
53  
54  
55  
56  
57  
58  
59  
60

1  
2  
3  
4 We shall combine the main terms “Chronic Pain” and “Acupuncture” indexed in the  
5 MeSH system,. Firstly, we will search the isolate terms and their synonyms, and then we will  
6 make a second search, combining and crossing the terms. Appendix A, Table 1.  
7  
8

9 We will verify the reference or citation list found in secondary studies to identify  
10 possibly eligible studies. When necessary, we shall contact the authors of the main studies to  
11 obtain further information.  
12  
13

### 14 **Study Eligibility Criteria**

15  
16  
17 *Design:* controlled randomized clinical trials, whose patient recruitment occurred from  
18 September 2004 (for the six domains) to March 2009 (for the four domains) and whose  
19 number of patients is equal or more than 100.  
20  
21

22 *Clinical condition:* studies which include patients aged 18 or older, with non-oncologic  
23 chronic pain. Eligible pain conditions: non-oncologic chronic pain, whose episode should  
24 have lasted at least four weeks.  
25  
26

27 *Intervention:* the studies should include a group of patients treated with acupuncture,  
28 and another group where patients were treated with sham acupuncture or no acupuncture, and  
29 studies where the choice blinding is unmistakable and adequate.  
30  
31

32 *Exclusion Criteria:* The following trials are to be excluded: neck pains associated with  
33 specific clinical conditions (e.g, fractures resulting from osteoporosis), shoulder pains  
34 associated with specific clinical conditions (Rotator cuff tendinitis, frozen shoulder, or  
35 bursitis).  
36  
37  
38  
39

### 40 **Determination of Eligibility**

41  
42 Two reviewers, in pairs, will evaluate independently whether summaries and titles are  
43 according to the eligibility criteria. Differences are to be solved by consensus among all  
44 reviewers. To assess the agreement of the selection we will use Kappa Test, given that kappa  
45 values between 0,40 and 0,59 are to be considered weak agreement, between 0,60 and 0,74  
46 medium agreement, and 0,75 or more excellent agreement.  
47  
48  
49

50 In order to exclude doubled articles, one reviewer will analyze all the eligible articles  
51 and identify those which have one or more authors in common. In case of doubled  
52 publication, we will use the article with most complete data.  
53  
54  
55  
56  
57  
58  
59  
60



### Data Extraction

We will adopt an Excel spreadsheet for the abstraction of data, to be used by two reviewers separately. A third reviewer will check the Excel spreadsheet to ensure the coherence of the answers obtained among collaborators and use the consensus when necessary.

For articles published only in summary or for those with important information missing, we will look for complete information about methods and results by contacting the authors.

Two reviewers will be calibrated by the extraction of at least three articles and next, will perform the consensus, in pairs and independently. This procedure shall occur until reviewers are able to extract the data. The collected data will be: name of the first author, date of publication, country of origin, impact of the journal, recruitment date of the first participant, presence of outcome domains IMMPACT, and the tools used for measuring the outcome domains, method of acupuncture, type of patient, duration of treatment. Besides this, the study will check if fundamental outcomes are reported by the patient (ORP), if clinical outcomes are reported (COR), if the outcome was reported by a third person (ORT), or a combination of the items above.

The data will be recorded to be transferred to a statistical analysis program later. A regression analysis will be conducted to explore factors that may be associated with the presence of outcome domains according to IMMPACT recommendations.

### Risk of Bias

A modified version of Cochrane for risk of bias will be used [17]. Reviewers will evaluate the risk of bias for each randomized trial independently, according to the following criteria: generation of random sequence, hiding of the choices, blinding of participants and professionals, blinding of outcome evaluators, if outcomes were reported adequately; incomplete outcomes; selective outcome reporting and other sources of bias. Reviewers will attribute answer alternatives “definitely yes”, “probably yes”, “probably not” and “definitely not” for each of the domains. Ultimately, “definitely yes” and “probably yes” will be attributed low risk of bias, whereas “definitely not” and “probably not” mean high risk of bias. Reviewers will solve divergences through discussion, and a third person will judge unsolved divergences.

## Definitions of IMMPACT outcome domain

The six IMMPACT domains recommended in 2003 which will be captured in this study are listed below, together with their definitions

1. Pain: Includes various aspects of pain evaluation (e.g, intensity of pain, duration and frequency). The global evaluation of pain is a general assessment which examines how the pain changed during the treatment.

2. Physical function: refers to the participant's capacity to conduct their daily activities (e.g, tasks, walks, trips and self-care), strength and resistance.

3. Emotional state: refers to the treatment associated to emotional anguish (e.g, depression, anxiety, anger or irritability).

4. Patient's classification of improvement and satisfaction with the treatment: refers to the participant's feeling with the treatment (that is, if they feel the positive features of the treatment surpass the negative ones ). This domain overcomes pain classification only.

5. Adverse symptoms and effects: refers to side effects caused by the treatment. The symptoms should be evaluated at the beginning of the trial, followed by the evaluation of symptoms and adverse events that come up during the study. Such measures may be taken in terms of presence, change and importance for the participants.

6. Willingness and participation: includes information about the participant's joining or withdrawing the treatment regime.

Trials with patients' recruitment as from March 2009 can only report the four first domains, according to the new recommendations of IMMPACT published in 2008.

## Statistical Analysis

The authors will summarize data by using mean and standard deviation (SD) for continuous variables in normal distribution; median and interquartile range (IQR) for continuous variable which were not in a normal distribution; and proportions for categorical variables. We will perform logistic regression adjusted to analysis and hypothesis. The associations with the highest IMMPACT domain rates are: (1) The latest published trials, (2) Trials published in the strongest impact journals, and (3) Trials that started recruiting participants a year after the publication of IMMPACT recommendations. We will estimate the date when recruitment started for trials whose recruitment start are not reported as the average duration from the beginning of the recruitment period to the publication date for trials which reported such information. We are to carry out logistic regressions adjusted to the analysis and

1  
2  
3  
4 hypothesis. The associations with the biggest IMMPACT domains are: (1) the latest published  
5 trials, (2) trials published in the strongest impact journals, and (3) trials which started  
6 recruiting participants one year after the publication of IMMPACT recommendations. For  
7 trials with unreported recruitment dates, we will use an estimation based on information from  
8 adequately reported trials, that is, the mean of beginning of recruitment, number of sessions  
9 and publication dates.

10  
11  
12  
13  
14 A model per IMMPACT domain that shows enough variability in the report is to be  
15 considered adequate: strictly speaking, we shall not consider domains reported in less than  
16 10% or more than 90% of the total number of outcomes assessed in all the clinical trials.  
17 Multicollinearity tests will examine whether any predictors were correlational. Specifically,  
18 we will calculate inflation rates of the variance associated with each independent variable in  
19 each regression model, and we will consider values that may indicate the presence of  
20 multicollinearity. In case multicollinearity between two variables is detected, we shall remove  
21 the variable(s) of minor importance. We will calculate odds ratios and associations of  
22 confidence intervals of 95% (IC), with the definition of significance level of  $P < 0,05$  for all  
23 the analyses.

24  
25  
26  
27  
28  
29  
30  
31 The authors are to carry out all the statistical analyses by using STATA , version 14.1.

## 32 33 34 35 36 **DISCUSSION**

37  
38  
39  
40  
41  
42  
43  
44  
45  
46 Our survey will evaluate methodologically the outcomes of CRTc which used  
47 acupuncture for NOCP. It will provide efficacy estimations for treatments, and assess the  
48 quality of evidence in a thorough and consistent way by using recommendations provided by  
49 IMMPACT. Our survey's outcomes will be significant for public health and for health  
50 professionals all over the world, mainly in Brazil.

51  
52  
53  
54  
55  
56  
57  
58  
59  
60 Since the publication of IMMPACT, it is not known whether studies using  
acupuncture as an intervention for chronic pain follow IMMPACT's recommendations.  
Without consistent and more thorough standard outcome reports for patients in CRTc and  
NOCP, the authors of such studies will be unable to judge objectively the effects of  
acupuncture. The data compiled on the use of acupuncture will inform both patients and  
health professionals about its efficacy and safety. Therefore, multiprofessional care and  
decision making based on evidence will be made easier.

1  
2  
3  
4 This Project aims at exploring some hypotheses to determine the use of IMMPACT  
5 recommendations on CRTc–NOCP. After the publication of IMMPACT orientations in  
6 August 2003 and later, in 2008, CRTc–NOCP which started recruiting participants as from  
7 September 2004 had better reports of main outcomes, regarding IMMPACT domains versus  
8 journals with lower impact factors. The main domains were reported by the patient, by the  
9 clinician, by a third person or by a combination of these subjects.  
10  
11  
12  
13

## 14 15 **ETHICS AND DIFUSION** 16

17  
18 Ethics is not necessary, as this is protocol for a methodological survey. The survey  
19 will be published in a jornal and presented in congresses with reviews by peers. The evidence  
20 of this study will allow health professionals to verify the efficacy and safety of acupuncture  
21 for the treatment of NOCP. Updates of this study should be conducted to inform and orient  
22 the practice of health care.  
23  
24  
25  
26

27 **Contributors:** LCL is the main researcher who leaded the writing of the manuscript.  
28 CCB and LGM are the project manager, co-researcher, who contributed to and writing and  
29 review of the manuscript. MTS is co-researcher, and contributed to the writing and review of  
30 the manuscript. All the authors have read and approved of the final manuscript.  
31  
32

33 **Acknowledgments:** The authors thank Dr. Caio Guimarães for his expert advice.  
34

35 **Sponsorship:** This Project has not received any specific funding of any public, private  
36 or non-profit agency.  
37

38 **Interest conflict:** None.  
39  
40  
41  
42  
43  
44  
45  
46  
47  
48  
49  
50  
51  
52  
53  
54  
55  
56  
57  
58  
59  
60

## REFERENCES

1. Ontario RNAo. Assessment and management of pain. 3<sup>a</sup> ed. Dez/2013 ed. Rockville MD: Agency for Healthcare Research and Quality (AHRQ), 2013.
2. SIGN SIGN. Management of chronic pain. A national clinical guideline. Secondary Management of chronic pain. A national clinical guideline 2013. <http://www.guideline.gov/content.aspx?id=47707&search=chronic+pain>.
3. Rasu RS, Vouthy K, Crowl AN, et al. Cost of pain medication to treat adult patients with nonmalignant chronic pain in the United States. *Journal of managed care & specialty pharmacy* 2014;**20**(9):921-8 doi: 10.18553/jmcp.2014.20.9.921[published Online First: Epub Date]].
4. Guerriere DN, Choiniere M, Dion D, et al. The Canadian STOP-PAIN project - Part 2: What is the cost of pain for patients on waitlists of multidisciplinary pain treatment facilities? *Canadian journal of anaesthesia = Journal canadien d'anesthesie* 2010;**57**(6):549-58 doi: 10.1007/s12630-010-9306-4[published Online First: Epub Date]].
5. Azevedo LF, Costa-Pereira A, Mendonca L, Dias CC, Castro-Lopes JM. The economic impact of chronic pain: a nationwide population-based cost-of-illness study in Portugal. *The European journal of health economics : HEPAC : health economics in prevention and care* 2016;**17**(1):87-98 doi: 10.1007/s10198-014-0659-4[published Online First: Epub Date]].
6. Gannon B, Finn DP, O'Gorman D, Ruane N, McGuire BE. The cost of chronic pain: an analysis of a regional pain management service in Ireland. *Pain medicine (Malden, Mass.)* 2013;**14**(10):1518-28 doi: 10.1111/pme.12202[published Online First: Epub Date]].
7. Brasil. Política Nacional de Práticas Integrativas e Complementares no SUS. Ministério da Saúde 2006;**DOU – seção 1**
8. Ischkanian PC, Pelicioni MCF. Challenges of complementary and alternative medicine in the SUS aiming to health promotion. *Revista brasileira de crescimento e desenvolvimento humano* 2012;**22**:233-38
9. Salud OMDl. Estrategia de la OMS sobre medicina tradicional 2014-2023. 2013
10. National Guideline C. Assessment and management of chronic pain. Secondary Assessment and management of chronic pain 2011. <http://www.guideline.gov/content.aspx?id=47646&search=assessment+and+management+of+chronic+pain>.
11. Anesthesiologists ASo. Practice guidelines for chronic pain management: an updated report by the American Society of Anesthesiologists Task Force on Chronic Pain Management and the American Society of Regional Anesthesia and Pain Medicine. *Anesthesiology* 2010;**112**(4):810-33 doi: 10.1097/ALN.0b013e3181c43103[published Online First: Epub Date]].
12. Ontario CoPaSo. Evidence-based recommendations for medical management of chronic non-malignant pain. . CPSO 2000
13. Madsen MV, Gøtzsche PC, Hróbjartsson A. Acupuncture treatment for pain: systematic review of randomised clinical trials with acupuncture, placebo acupuncture, and no acupuncture groups. *BMJ* 2009;**338**
14. Dworkin RH, Turk DC, Peirce-Sandner S, et al. Research design considerations for confirmatory chronic pain clinical trials: IMMPACT recommendations. *Pain* 2010;**149**(2):177-93 doi: 10.1016/j.pain.2010.02.018[published Online First: Epub Date]].

15. Turk DC, Dworkin RH, Allen RR, et al. Core outcome domains for chronic pain clinical trials: IMMPACT recommendations. *Pain* 2003;**106**(3):337-45
16. Dworkin RH, Turk DC, Farrar JT, et al. Core outcome measures for chronic pain clinical trials: IMMPACT recommendations. *Pain* 2005;**113**(1-2):9-19 doi: 10.1016/j.pain.2004.09.012[published Online First: Epub Date].
17. Higgins JP GS. Cochrane handbook for systematic reviews of interventions, version [5.1.0](updated March 2011). The Cochrane Collaboration 2011
18. Vickers AJ, Cronin AM, Maschino AC, et al. Acupuncture for chronic pain: individual patient data meta-analysis. *Archives of internal medicine* 2012;**172**(19):1444-53 doi: 10.1001/archinternmed.2012.3654[published Online First: Epub Date].

**Table 1. Search Strategy for database**

Database: Ovid MEDLINE(R) In-Process & Other Non-Indexed Citations, Ovid MEDLINE(R) Daily and Ovid MEDLINE(R) <1946 to Present>

Search Strategy:

1 exp Acupuncture Analgesia/  
 2 exp Acupuncture/  
 3 acupuncture.mp.  
 4 1 OR 2 OR 3  
 5 chronic pain.mp.  
 6 exp Chronic Pain/  
 7 exp Chronic Disease/  
 8 5 OR 6 OR 7  
 9 4 AND 8

Database: Embase <1974 to 2016 June 28>

Search Strategy:

1 exp acupuncture analgesia/  
 2 acupuncture.mp.  
 3 exp acupuncture/  
 4 1 OR 2 OR 3  
 5 exp chronic pain/  
 6 chronic pain.mp.  
 7 5 OR 6  
 8 4 AND 7

Database: AMED (Allied and Complementary Medicine) <1985 to June 2016>

Search Strategy:

1 acupuncture.mp.  
 2 exp Acupuncture/  
 3 1 OR 2  
 4 exp Chronic disease/  
 5 chronic pain.mp.  
 6 4 OR 5  
 7 3 AND 6

Database: CINAHL

Search Strategy:

1 (MH "Acupuncture+")  
 2 (MH "Acupuncture Analgesia")  
 3 1 OR 2  
 4 (MH "Chronic Pain")  
 5 3 AND 4

Database: Cochrane Library

Search Strategy:

1 "acupuncture":ti,ab,kw  
 2 "acupuncture analgesia":ti,ab,kw  
 3 1 OR 2  
 4 "chronic pain":ti,ab,kw  
 5 3 AND 4

Database: Web of Science <1976 to July 2016>

Search Strategy:

1 acupuncture

1  
2  
3  
4 2 \*acupuncture\*  
5 3 1 OR 2  
6 4 chronic pain  
7 5 chronic \*pain\*  
8 6 4 OR 5  
9 7 3 AND 6  
10  
11  
12  
13  
14  
15  
16  
17  
18  
19  
20  
21  
22  
23  
24  
25  
26  
27  
28  
29  
30  
31  
32  
33  
34  
35  
36  
37  
38  
39  
40  
41  
42  
43  
44  
45  
46  
47  
48  
49  
50  
51  
52  
53  
54  
55  
56  
57  
58  
59  
60

For peer review only



## PRISMA-P 2015 Checklist

This checklist has been adapted for use with protocol submissions to *Systematic Reviews* from Table 3 in Moher D et al: Preferred reporting items for systematic review and meta-analysis protocols (PRISMA-P) 2015 statement. *Systematic Reviews* 2015 4:1

| Section/topic                     | #  | Checklist item                                                                                                                                                                                  | Information reported     |                          | Page number(s) |
|-----------------------------------|----|-------------------------------------------------------------------------------------------------------------------------------------------------------------------------------------------------|--------------------------|--------------------------|----------------|
|                                   |    |                                                                                                                                                                                                 | Yes                      | No                       |                |
| <b>ADMINISTRATIVE INFORMATION</b> |    |                                                                                                                                                                                                 |                          |                          |                |
| <b>Title</b>                      |    |                                                                                                                                                                                                 |                          |                          |                |
| Identification                    | 1a | Identify the report as a protocol of a systematic review                                                                                                                                        | <input type="checkbox"/> |                          | 1              |
| Update                            | 1b | If the protocol is for an update of a previous systematic review, identify as such                                                                                                              |                          |                          | not applicable |
| <b>Registration</b>               | 2  | If registered, provide the name of the registry (e.g., PROSPERO) and registration number in the Abstract                                                                                        |                          |                          | not applicable |
| <b>Authors</b>                    |    |                                                                                                                                                                                                 |                          |                          |                |
| Contact                           | 3a | Provide name, institutional affiliation, and e-mail address of all protocol authors; provide physical mailing address of corresponding author                                                   | <input type="checkbox"/> |                          | 1              |
| Contributions                     | 3b | Describe contributions of protocol authors and identify the guarantor of the review                                                                                                             | <input type="checkbox"/> |                          | 10             |
| <b>Amendments</b>                 | 4  | If the protocol represents an amendment of a previously completed or published protocol, identify as such and list changes; otherwise, state plan for documenting important protocol amendments |                          | <input type="checkbox"/> | not applicable |
| <b>Support</b>                    |    |                                                                                                                                                                                                 |                          |                          |                |
| Sources                           | 5a | Indicate sources of financial or other support for the review                                                                                                                                   | <input type="checkbox"/> |                          | 10             |
| Sponsor                           | 5b | Provide name for the review funder and/or sponsor                                                                                                                                               |                          | <input type="checkbox"/> | not applicable |
| Role of sponsor/funder            | 5c | Describe roles of funder(s), sponsor(s), and/or institution(s), if any, in developing the protocol                                                                                              |                          | <input type="checkbox"/> | not applicable |
| <b>INTRODUCTION</b>               |    |                                                                                                                                                                                                 |                          |                          |                |
| <b>Rationale</b>                  | 6  | Describe the rationale for the review in the context of what is already known                                                                                                                   | <input type="checkbox"/> |                          | 5              |
| <b>Objectives</b>                 | 7  | Provide an explicit statement of the question(s) the review will address with reference to participants, interventions, comparators, and outcomes (PICO)                                        | <input type="checkbox"/> |                          | 5              |

| Section/topic                             | #   | Checklist item                                                                                                                                                                                                                              | Information reported     |    | Page number(s) |
|-------------------------------------------|-----|---------------------------------------------------------------------------------------------------------------------------------------------------------------------------------------------------------------------------------------------|--------------------------|----|----------------|
|                                           |     |                                                                                                                                                                                                                                             | Yes                      | No |                |
| <b>METHODS</b>                            |     |                                                                                                                                                                                                                                             |                          |    |                |
| <b>Eligibility criteria</b>               | 8   | Specify the study characteristics (e.g., PICO, study design, setting, time frame) and report characteristics (e.g., years considered, language, publication status) to be used as criteria for eligibility for the review                   | <input type="checkbox"/> |    | 5, 6           |
| <b>Information sources</b>                | 9   | Describe all intended information sources (e.g., electronic databases, contact with study authors, trial registers, or other grey literature sources) with planned dates of coverage                                                        | <input type="checkbox"/> |    | 5, 6           |
| <b>Search strategy</b>                    | 10  | Present draft of search strategy to be used for at least one electronic database, including planned limits, such that it could be repeated                                                                                                  | <input type="checkbox"/> |    | 5, 6           |
| <b>STUDY RECORDS</b>                      |     |                                                                                                                                                                                                                                             |                          |    |                |
| Data management                           | 11a | Describe the mechanism(s) that will be used to manage records and data throughout the review                                                                                                                                                | <input type="checkbox"/> |    | 7              |
| Selection process                         | 11b | State the process that will be used for selecting studies (e.g., two independent reviewers) through each phase of the review (i.e., screening, eligibility, and inclusion in meta-analysis)                                                 | <input type="checkbox"/> |    | 7              |
| Data collection process                   | 11c | Describe planned method of extracting data from reports (e.g., piloting forms, done independently, in duplicate), any processes for obtaining and confirming data from investigators                                                        | <input type="checkbox"/> |    | 7              |
| <b>Data items</b>                         | 12  | List and define all variables for which data will be sought (e.g., PICO items, funding sources), any pre-planned data assumptions and simplifications                                                                                       | <input type="checkbox"/> |    | 7              |
| <b>Outcomes and prioritization</b>        | 13  | List and define all outcomes for which data will be sought, including prioritization of main and additional outcomes, with rationale                                                                                                        | <input type="checkbox"/> |    | 7,8            |
| <b>Risk of bias in individual studies</b> | 14  | Describe anticipated methods for assessing risk of bias of individual studies, including whether this will be done at the outcome or study level, or both; state how this information will be used in data synthesis                        | <input type="checkbox"/> |    | 7              |
| <b>DATA</b>                               |     |                                                                                                                                                                                                                                             |                          |    |                |
| <b>Synthesis</b>                          | 15a | Describe criteria under which study data will be quantitatively synthesized                                                                                                                                                                 | <input type="checkbox"/> |    | 8, 9           |
|                                           | 15b | If data are appropriate for quantitative synthesis, describe planned summary measures, methods of handling data, and methods of combining data from studies, including any planned exploration of consistency (e.g., $I^2$ , Kendall's tau) | <input type="checkbox"/> |    | 8, 9           |
|                                           | 15c | Describe any proposed additional analyses (e.g., sensitivity or subgroup analyses, meta-regression)                                                                                                                                         | <input type="checkbox"/> |    | 9              |
|                                           | 15d | If quantitative synthesis is not appropriate, describe the type of summary planned                                                                                                                                                          | <input type="checkbox"/> |    | 9              |

1  
2  
3  
4  
5  
6  
7  
8  
9  
10  
11  
12  
13  
14  
15  
16  
17  
18  
19  
20  
21  
22  
23  
24  
25  
26  
27  
28  
29  
30  
31  
32  
33  
34  
35  
36  
37  
38  
39  
40  
41  
42  
43  
44  
45  
46  
47  
48  
49

| Section/topic                     | #  | Checklist item                                                                                                              | Information reported     |                          | Page number(s) |
|-----------------------------------|----|-----------------------------------------------------------------------------------------------------------------------------|--------------------------|--------------------------|----------------|
|                                   |    |                                                                                                                             | Yes                      | No                       |                |
| Meta-bias(es)                     | 16 | Specify any planned assessment of meta-bias(es) (e.g., publication bias across studies, selective reporting within studies) | <input type="checkbox"/> |                          | 7, 8           |
| Confidence in cumulative evidence | 17 | Describe how the strength of the body of evidence will be assessed (e.g., GRADE)                                            |                          | <input type="checkbox"/> | not applicable |

For peer review only

# BMJ Open

## USE OF IMPACT DOMAINS IN CLINICAL TRIALS OF ACUPUNCTURE FOR CHRONIC PAIN: A PROTOCOL FOR A METHODOLOGICAL SURVEY

|                                 |                                                                                                                                                                                                                                                                                             |
|---------------------------------|---------------------------------------------------------------------------------------------------------------------------------------------------------------------------------------------------------------------------------------------------------------------------------------------|
| Journal:                        | <i>BMJ Open</i>                                                                                                                                                                                                                                                                             |
| Manuscript ID                   | bmjopen-2016-014904.R1                                                                                                                                                                                                                                                                      |
| Article Type:                   | Protocol                                                                                                                                                                                                                                                                                    |
| Date Submitted by the Author:   | 19-May-2017                                                                                                                                                                                                                                                                                 |
| Complete List of Authors:       | Mazzei, Lauren; Universidade de Sorocaba, Programa de Pós-Graduação em Ciências Farmacêuticas<br>Bergamaschi, Cristiane; University of Sorocaba, Pharmaceutical Science<br>Silva, Marcus; Federal University of Amazonas, Clinical Epidemiology<br>Lopes, Luciane; UNISO, Pharmacie Science |
| <b>Primary Subject Heading</b>: | Research methods                                                                                                                                                                                                                                                                            |
| Secondary Subject Heading:      | Complementary medicine, Evidence based practice                                                                                                                                                                                                                                             |
| Keywords:                       | Acupuncture, Chronic Pain, Methodological Survey                                                                                                                                                                                                                                            |
|                                 |                                                                                                                                                                                                                                                                                             |

SCHOLARONE™  
Manuscripts

1  
2  
3 **USE OF IMPACT DOMAINS IN CLINICAL TRIALS OF ACUPUNCTURE**  
4 **FOR CHRONIC PAIN: A PROTOCOL FOR A METHODOLOGICAL SURVEY**  
5  
6

7 **Authors:** Lauren Giusti Mazzei<sup>1</sup>, Cristiane de Cássia Bergamaschi<sup>1</sup>, Marcus Tolentino  
8 Silva<sup>1</sup>, Luciane Cruz Lopes<sup>1</sup>  
9

10  
11 **Author affiliations**

12 <sup>1</sup> Pharmaceutical Sciences Graduate Program, University of Sorocaba, Sorocaba, State  
13 of São Paulo, Brazil  
14

15 Email address:

16 Lauren Giusti Mazzei [laurengmazzei@hotmail.com](mailto:laurengmazzei@hotmail.com)

17 Cristiane de Cássia Bergamaschi [cristiane.motta@prof.uniso.br](mailto:cristiane.motta@prof.uniso.br)

18 Marcus Tolentino Silva [marcusts@gmail.com](mailto:marcusts@gmail.com)

19 Luciane Cruz Lopes [luslopes@terra.com.br](mailto:luslopes@terra.com.br)  
20  
21

22 Corresponding author:

23 Luciane Cruz Lopes

24 Universidade de Sorocaba - UNISO

25 Rodovia Raposo Tavares, km 92.5, 18023-000

26 Sorocaba – SP, Brasil

27 Phone/Fax (15) 2101-7104  
28  
29

30 2305 words  
31  
32  
33  
34  
35  
36  
37  
38  
39  
40  
41  
42  
43  
44  
45  
46  
47  
48  
49  
50  
51  
52  
53  
54  
55  
56  
57  
58  
59  
60

## SUMMARY

**INTRODUCTION:** Pain is one of the most common and most debilitating complaints among patients. They affect the individual, their relationship with friends and family, their work force, and their sociability. Acupuncture is one of the therapeutic resources for managing chronic pain. Given the variability of outcome measures in Controlled Randomized Clinical Trials on Non-Oncologic Chronic Pain (CRCT-NOCP), the Initiative in Methods, Measurements and Pain Assessment in Clinical Trials (IMMPACT) recommends six domains to be covered in evaluating the effectiveness of treatments for chronic pain.

**OBJECTIVE:** The main objective of this study is to check whether methodological quality of outcome reporting in published trials have used IMMPACT recommendations in measuring CRCT-NOCP outcomes when acupuncture was used as a treatment.

**METHOD:** This is a methodological study. We will systematically search for eligible studies in specific database with a defined strategy. We are to use terms of MeSH “acupuncture”, “chronic pain” and its similar terms, without idiom restrictions. Eligible studies include those which randomized and chose NOCP patients to be treated with acupuncture or control (sham acupuncture or no acupuncture), recruited after September 2004, number of patients equal or more than 100. The measured outcomes are to be the presence of outcome domains recommended by IMMPACT, domains reported by patient or clinician, tools used to measure such domains, besides other features of the studies. We shall conduct a regression analysis to explore factors which can be associated with the presence of outcome domains according to IMMPACT recommendations.

**ETHICS AND DISSEMINATION:** This survey will be submitted to presentation in congresses and publishing in a scientific journal. The evidence obtained in this study will allow us to measure the quality of the evidence and greater transparency in decisions regarding the use of acupuncture as a viable alternative to managing chronic pain.

**Keywords:** Acupuncture. Chronic Pain. Methodological Survey.

### Strong Points and Limitations of this Study

- ✓ This is the first study to evaluate the outcome domains used in CRCT using acupuncture as intervention to the treatment of NOCP.

- ✓ Acupuncture can be an effective therapy in chronic pain control, avoiding costly expenses with analgesic medication which generate dependence (opioids), or limiting adverse effects as in the case of non-steroid anti-inflammatories (gastric ulcer and cardiovascular events) that have a direct impact in the patient's life. Therefore, checking compliance with IMMPACT recommendations in CRCT about NOCP may appraise the quality of the evidence and provide greater transparency in decisions regarding the use of acupuncture as a viable alternative in this clinical condition. It can also guide physicians in clinical practice decision making.
- ✓ The methods contain explicit eligibility criteria, a comprehensive research and a double independent selection, including independent appraisal of bias risk.
- ✓ Primary studies are probably limited in conception and outcome measures and thus, they have high bias risk. Besides, techniques or point categories used in acupuncture may be uncertain or varied in different studies.
- ✓ This enquiry has not received any specific sponsorship from any public, private or non-profit agency.

## INTRODUCTION

Non-Oncologic Chronic Pain (NOCP) is defined as a persisting painful feeling for more than some months, which may be associated to traumas and illnesses or not. [1] It is estimated that 18, 9% of the world population present chronic pain. It is one of the most common complaints among patients, affecting not only the subject in their individuality, but also in a general way. [2]

It is regarded as a health problem that consumes 22% of primary health appointments on average. In the United States, costs with pain medication are around US\$17, 8 billion a year. [3] In Canada the average cost is of \$ 1,462 per individual monthly with chronic pain on waiting lists [4] and of € 1,883.30 per individual, adult in Portugal. [5]

Acupuncture is one of the resources that compose the National Policy of Integrated and Supplementary Practices (NPISP) IN Brazil. It is a possible therapy in managing chronic pain with sensitive cost reduction to the government and adverse effect reduction to the patient. [6] The World Health Organization (WHO) has launched

1  
2  
3 a strategy for the period 2014-2023 to integrate to traditional medicine and supplement  
4 the health system in a safe, respectful, accessible and effective way. [7]

5  
6 The search for international guidelines approaching the use of acupuncture for  
7 NOCP in the adult population results in few findings or in conflicting recommendations.  
8 Acupuncture is recommended as an adjunct to conventional treatment of NOCP, but  
9 only the American guidelines specify the moment in which it should be used within the  
10 conventional drug treatment flow. [8] [9] [10] [2]

11  
12 Among the policies we looked up, the recommendation of acupuncture for many  
13 painful conditions is based on low quality evidence due to the diversity in the  
14 methodology of CRCT. [2 8-10] Besides this, such guidelines do not discriminate the  
15 power of the recommendation, except for those in Scotland and Canada. [2 8]

16  
17 Even showing quality, CRCT with adequate randomization and blinding may not  
18 provide the best approach for the development of strong evidence base for managing  
19 pain, in case the outcomes and its tools are not adequate. [11] Such limitations have  
20 been recognized internationally, leading to the development of the Initiative on  
21 Methods, Measurements and Pain Assessment in Clinical Trials (IMMPACT) in 2002.

22  
23 The initiative gathered 27 experts from universities, governmental agencies and  
24 pharmaceutical industry, who identified consensually a nucleus of six outcome domains  
25 that should be considered in CRCT for chronic pain. [12] The outcome domains  
26 considered were: (1) pain; (2) physical function; (3) emotional state; (4) evaluation of  
27 the participants regarding improvement and satisfaction with treatment; (5) adverse  
28 symptoms; and (6) the participant's willingness, but the first four domains listed as  
29 main. [13]

30  
31 The establishment of a standard set of outcome domains in CRCT about chronic  
32 pain encourages researchers to consider chronic pain as a complex phenomenon which  
33 affects patients in multiple dimensions. It protects against the polarization of selective  
34 outcomes, a common problem in all medical literature. It makes systematic reviews and  
35 Meta analyses easier, which allows researchers to generate more precise estimations of  
36 treatment effects due to sharing common outcomes of individual trials. [14]

37  
38 Variability in outcome measures in CRCT about NOCP generates inaccuracies  
39 in the effectiveness of certain treatments. Although the recommendation of IMMPACT  
40 was published in 2003 and updated in 2008, there is no information on whether  
41 subsequent clinical trials published comply with IMMPACT recommendations on their  
42 outcome measures.



1  
2  
3 The general aim of this project is to verify changes occurred in the way of reporting and  
4 assessing outcomes after the publication of IMMPACT recommendations in CRCT  
5 about the use of acupuncture in patients with NOCP.  
6  
7  
8

## 9 10 **METHODS**

### 11 12 **Study Design**

13  
14 The study comprises a methodological survey of randomized clinical trials which used  
15 acupuncture for the treatment of chronic pain. The methodological survey is a type of  
16 study on method enquiry, with data collection from selected CRCT, not based on  
17 questionnaires but using systematic methods in its execution.  
18  
19  
20

### 21 22 **Reference Sources and Search**

23  
24  
25 All trials already included in CRCT-NOCP, published as of September 2004,  
26 selected in the systematic review carried out by Vickers et al. [15] Additional research  
27 will be performed in studies dating as from January 2011 and 6 months before the  
28 systematic review of the comprehensive search date on the theme (considering delay in  
29 indexing) to nowadays. The search for eligible studies will be accomplished by  
30 systematic research of database, namely Lilacs, CINAHL, EMBASE, MEDLINE,  
31 AMED, Web of Science, Clinical Trials and Cochrane Central Registry of Controlled  
32 Trials, with a defined search strategy, free of idiom restriction.  
33  
34  
35  
36  
37  
38  
39

40  
41 We shall combine the main terms “Chronic Pain” and “Acupuncture” indexed in  
42 the MeSH system. Firstly, we will search the isolate terms and their synonyms, and then  
43 we will make a second search, combining and crossing the terms. Appendix A, Table 1.  
44  
45

46  
47 We will verify the reference or citation list found in secondary studies to identify  
48 possibly eligible studies. When necessary, we shall contact the authors of the main  
49 studies to obtain further information.  
50  
51

### 52 53 **Study Eligibility Criteria**

54  
55  
56 The eligibility criteria for this study will be the same as those adopted in the  
57 systematic review published in 2012.  
58  
59  
60

1  
2  
3  
4  
5  
6  
7  
8  
9  
10  
11  
12  
13  
14  
15  
*Design:* controlled randomized clinical trials, whose patient recruitment occurred from September 2004 and whose number of patients is equal or more than 100.

16  
17  
18  
19  
20  
21  
22  
23  
24  
25  
*Clinical condition:* studies which include patients aged 18 or older, with non-oncologic chronic pain. Eligible pain conditions: Osteoarthritis, chronic or recurrent headaches, specific and nonspecific shoulder pains, and nonspecific back or neck pain. For osteoarthritis or headaches, it will not be necessary the duration of the pain, since both are of a chronic nature. For pain in the shoulder, back and neck, the pain episode should be at least four weeks in duration.

26  
27  
28  
29  
30  
31  
32  
33  
34  
35  
36  
37  
38  
39  
40  
41  
42  
43  
44  
45  
46  
47  
*Intervention:* the studies should include a group of patients treated with acupuncture, where acupuncture points or trigger points were stimulated with acupuncture needles, and another group where patients were treated with sham acupuncture or no acupuncture, and studies where the choice blinding is unmistakable and adequate.

48  
49  
50  
51  
52  
53  
54  
55  
56  
57  
58  
59  
60  
*Exclusion Criteria:* The following trials are to be excluded: neck or back pains associated with specific clinical conditions (e.g., fractures resulting from osteoporosis).

### **Determination of Eligibility**

Two reviewers, in pairs, will evaluate independently whether summaries and titles are according to the eligibility criteria. Differences are to be solved by consensus among all reviewers. To assess the agreement of the selection we will use Kappa Test, given that kappa values between 0,40 and 0,59 are to be considered weak agreement, between 0,60 and 0,74 medium agreement, and 0,75 or more excellent agreement.

In order to exclude doubled articles, one reviewer will analyze all the eligible articles and identify those which have one or more authors in common. In case of doubled publication, we will use the article with most complete data.

### **Data Extraction**

We will adopt an Excel spreadsheet for the abstraction of data, to be used by two reviewers separately. A third reviewer will check the Excel spreadsheet to ensure the coherence of the answers obtained among collaborators and use the consensus when necessary.

1  
2  
3 For articles published only in summary or for those with important information  
4 missing, we will look for complete information about methods and results by contacting  
5 the authors.  
6  
7

8 Two reviewers will be calibrated by the extraction of at least three articles and  
9 next, will perform the consensus, in pairs and independently. This procedure shall occur  
10 until reviewers are able to extract the data. The collected data will be: name of the first  
11 author, date of publication, country of origin, impact of the journal, recruitment date of  
12 the first participant, presence of outcome domains IMMPACT, and the tools used for  
13 measuring the outcome domains, method of acupuncture, clinical condition of the  
14 patient, duration of treatment. Besides this, the study will check if fundamental  
15 outcomes are reported by the patient (ORP), if clinical outcomes are reported (COR), if  
16 the outcome was reported by a third person (ORT), or a combination of the items above.  
17  
18  
19  
20  
21  
22  
23

24 The data will be recorded to be transferred to a statistical analysis program later.  
25 A regression analysis will be conducted to explore factors that may be associated with  
26 the presence of outcome domains according to IMMPACT recommendations.  
27  
28  
29  
30

### 31 **Risk of Bias**

32 A modified version of Cochrane for risk of bias will be used. [14] Reviewers  
33 will evaluate the risk of bias for each randomized trial independently, according to the  
34 following criteria: generation of random sequence, hiding of the choices, blinding of  
35 participants and professionals, blinding of outcome evaluators, if outcomes were  
36 reported adequately; incomplete outcomes; selective outcome reporting and other  
37 sources of bias. Reviewers will attribute answer alternatives “definitely yes”, “probably  
38 yes”, “probably not” and “definitely not” for each of the domains. Ultimately,  
39 “definitely yes” and “probably yes” will be attributed low risk of bias, whereas  
40 “definitely not” and “probably not” mean high risk of bias. Reviewers will solve  
41 divergences through discussion, and a third person will judge unsolved divergences.  
42  
43  
44  
45  
46  
47  
48  
49

### 50 **Definitions of IMMPACT outcome domain**

51 The four IMMPACT domains recommended in 2003 and 2008 which will be  
52 captured in this study are listed below, together with their definitions  
53  
54  
55  
56  
57  
58  
59  
60

1  
2  
3 1. Pain: Includes various aspects of pain evaluation (e.g., intensity of pain,  
4 duration and frequency). The global evaluation of pain is a general assessment which  
5 examines how the pain changed during the treatment.  
6  
7

8 2. Physical function: refers to the participant's capacity to conduct their daily  
9 activities (e.g., tasks, walks, trips and self-care), strength and resistance.  
10

11 3. Emotional state: refers to the treatment associated to emotional anguish (e.g.,  
12 depression, anxiety, anger or irritability).  
13

14 4. Patient's classification of improvement and satisfaction with the treatment:  
15 refers to the participant's feeling with the treatment (that is, if they feel the positive  
16 features of the treatment surpass the negative ones). This domain overcomes pain  
17 classification only.  
18  
19  
20

## 21 22 23 **Statistical Analysis**

24  
25  
26 The descriptive part includes year of publication, place of study, factor of impact  
27 of the journal and items of evaluation of methodological quality. Afterwards, the  
28 frequency of measurement of pain, physical function, emotional state and patient  
29 satisfaction improvement will be described according to the IMMPACT  
30 recommendations.  
31  
32  
33

34 Thereafter, for each domain, the measurement method is quantized, that is,  
35 whether the pain was measured by VAS and / or Van, whether physical function was  
36 measured by multidimensional inventory to pain and / or inventory summary of the  
37 pain, whether the emotional state was measured by the Beck depression inventory and /  
38 or mood state profile, and whether the improvement in patient satisfaction was  
39 measured by the patient's overall impression of change. The correct applicability of the  
40 instrument will also be quantified (if the domain report was executed by the patient,  
41 clinical or third parties). Finally, compliance with IMMPACT will be measured by the  
42 attendance of the four domains. It is also planned to quantify the number of IMMPACT  
43 domains that will be served, in order to generate a score between 0-4 points. The score  
44 will be described on average, standard deviation, median and interquartile range.  
45  
46  
47  
48  
49  
50  
51

52 The factors associated with compliance with the areas of IMMPACT will be  
53 investigated. For this, a logistic regression will be performed considering the domains  
54 of IMMPACT as dependent variables and the characteristics of the study as independent  
55 variables (year of publication, place of study, periodic impact factor and items of  
56  
57  
58  
59  
60

1  
2  
3 methodological quality evaluation). The results will be expressed in Odds Ratio with  
4 respective 95% confidence intervals.  
5

6 Factors associated with the IMMPACT score will also be investigated.  
7 Depending on the data distribution, analysis of variance (ANOVA) or Kruskal Wallis  
8 will be performed. A significant statistical difference will be attributed to cases of  $p$   
9  $\leq 0.05$ .  
10  
11

12 Sensitivity analysis will be performed by means of a bootstrap technique. [16]  
13 All calculations will run in STATA 14.2.  
14  
15

## 16 17 18 **DISCUSSION** 19

20 Our survey will evaluate methodologically the outcomes of CRTC which used  
21 acupuncture for NOCP. It will provide efficacy estimations for treatments, and assess  
22 the quality of evidence in a thorough and consistent way by using recommendations  
23 provided by IMMPACT. Our survey's outcomes will be significant for public health  
24 and for health professionals all over the world, mainly in Brazil.  
25  
26  
27  
28

29 Since the publication of IMMPACT, it is not known whether studies using  
30 acupuncture as an intervention for chronic pain follow IMMPACT's recommendations.  
31 Without consistent and more thorough standard outcome reports for patients in CRTC  
32 and NOCP, the authors of such studies will be unable to judge objectively the effects of  
33 acupuncture. The data compiled on the use of acupuncture will inform both patients and  
34 health professionals about its efficacy and safety. Therefore, multiprofessional care and  
35 decision-making based on evidence will be made easier.  
36  
37  
38  
39

40 This Project aims at exploring some hypotheses to determine the use of  
41 IMMPACT recommendations on CRTC–NOCP. After the publication of IMMPACT  
42 orientations in August 2003 and later, in 2008, CRTC–NOCP which started recruiting  
43 participants as from September 2004 had better reports of main outcomes, regarding  
44 IMMPACT domains versus journals with lower impact factors. The main domains were  
45 reported by the patient, by the clinician, by a third person or by a combination of these  
46 subjects.  
47  
48  
49  
50  
51  
52  
53  
54  
55  
56  
57  
58  
59  
60

## ETHICS AND DIFUSION

Ethics is not necessary, as this is protocol for a methodological survey. The survey will be published in a journal and presented in congresses with reviews by peers. The evidence of this study will allow health professionals to verify the efficacy and safety of acupuncture for the treatment of NOCP. Updates of this study should be conducted to inform and orient the practice of health care.

**Contributors:** LCL is the main researcher who led the writing of the manuscript. CCB and LGM are the project manager, co-researcher, who contributed to and writing and review of the manuscript. MTS is co-researcher, and contributed to the writing and review of the manuscript. All the authors have read and approved of the final manuscript.

**Acknowledgments:** The authors thank Dr. Caio Guimarães for his expert advice.

**Sponsorship:** This Project has not received any specific funding of any public, private or non-profit agency.

**Interest conflict:** None.

## REFERENCES

1. Ontario RNAo. Assessment and management of pain. 3<sup>a</sup> ed. Dez/2013 ed. Rockville MD: Agency for Healthcare Research and Quality (AHRQ), 2013.
2. SIGN SIGN. Management of chronic pain. A national clinical guideline. Secondary Management of chronic pain. A national clinical guideline 2013. <http://www.guideline.gov/content.aspx?id=47707&search=chronic+pain>.
3. Rasu RS, Vouthy K, Crowl AN, et al. Cost of pain medication to treat adult patients with nonmalignant chronic pain in the United States. Journal of managed care & specialty pharmacy 2014;**20**(9):921-8 doi: 10.18553/jmcp.2014.20.9.921[published Online First: Epub Date]].
4. Guerriere DN, Choiniere M, Dion D, et al. The Canadian STOP-PAIN project - Part 2: What is the cost of pain for patients on waitlists of multidisciplinary pain treatment facilities? Canadian journal of anaesthesia = Journal canadien d'anesthesie 2010;**57**(6):549-58 doi: 10.1007/s12630-010-9306-4[published Online First: Epub Date]].
5. Azevedo LF, Costa-Pereira A, Mendonca L, Dias CC, Castro-Lopes JM. The economic impact of chronic pain: a nationwide population-based cost-of-illness study in Portugal. The European journal of health economics : HEPAC : health economics in prevention and care 2016;**17**(1):87-98 doi: 10.1007/s10198-014-0659-4[published Online First: Epub Date]].
6. Brasil. Política Nacional de Práticas Integrativas e Complementares no SUS. Ministério da Saúde 2006;**DOU – seção 1**
7. Salud OMDI. Estrategia de la OMS sobre medicina tradicional 2014-2023. 2013
8. Ontario CoPaSo. Evidence-based recommendations for medical management of chronic non-malignant pain. . CPSO 2000
9. Practice guidelines for chronic pain management: an updated report by the American Society of Anesthesiologists Task Force on Chronic Pain Management and the American Society of Regional Anesthesia and Pain Medicine. Anesthesiology 2010;**112**(4):810-33
10. National Guideline C. Assessment and management of chronic pain. Secondary Assessment and management of chronic pain 2011. <http://www.guideline.gov/content.aspx?id=47646&search=assessment+and+management+of+chronic+pain>.
11. Dworkin RH, Turk DC, Peirce-Sandner S, et al. Research design considerations for confirmatory chronic pain clinical trials: IMMPACT recommendations. Pain 2010;**149**(2):177-93 doi: 10.1016/j.pain.2010.02.018[published Online First: Epub Date]].
12. Turk DC, Dworkin RH, Allen RR, et al. Core outcome domains for chronic pain clinical trials: IMMPACT recommendations. Pain 2003;**106**(3):337-45
13. Dworkin RH, Turk DC, Farrar JT, et al. Core outcome measures for chronic pain clinical trials: IMMPACT recommendations. Pain 2005;**113**(1-2):9-19 doi: 10.1016/j.pain.2004.09.012[published Online First: Epub Date]].
14. Higgins JP GS. Cochrane handbook for systematic reviews of interventions, version [5.1.0](updated March 2011). The Cochrane Collaboration 2011
15. Vickers AJ, Cronin AM, Maschino AC, et al. Acupuncture for chronic pain: individual patient data meta-analysis. Archives of internal medicine 2012;**172**(19):1444-53 doi: 10.1001/archinternmed.2012.3654[published Online First: Epub Date]].

- 1  
2  
3  
4 16. Henderson AR. The bootstrap: a technique for data-driven statistics. Using computer-  
5 intensive analyses to explore experimental data. Clinica chimica acta; international  
6 journal of clinical chemistry 2005;359(1-2):1-26 doi:  
7 10.1016/j.cccn.2005.04.002[published Online First: Epub Date].  
8  
9  
10  
11  
12  
13  
14  
15  
16  
17  
18  
19  
20  
21  
22  
23  
24  
25  
26  
27  
28  
29  
30  
31  
32  
33  
34  
35  
36  
37  
38  
39  
40  
41  
42  
43  
44  
45  
46  
47  
48  
49  
50  
51  
52  
53  
54  
55  
56  
57  
58  
59  
60



## Appendix A

Table 1. Search Strategy for database

Database: Ovid MEDLINE(R) In-Process & Other Non-Indexed Citations, Ovid MEDLINE(R) Daily and Ovid MEDLINE(R) <1946 to Present>

Search Strategy:

1 exp Acupuncture Analgesia/  
 2 exp Acupuncture/  
 3 acupuncture.mp.  
 4 1 OR 2 OR 3  
 5 chronic pain.mp.  
 6 exp Chronic Pain/  
 7 exp Chronic Disease/  
 8 5 OR 6 OR 7  
 9 4 AND 8

Database: Embase <1974 to 2016 June 28>

Search Strategy:

1 exp acupuncture analgesia/  
 2 acupuncture.mp.  
 3 exp acupuncture/  
 4 1 OR 2 OR 3  
 5 exp chronic pain/  
 6 chronic pain.mp.  
 7 5 OR 6  
 8 4 AND 7

Database: AMED (Allied and Complementary Medicine) <1985 to June 2016>

Search Strategy:

1 acupuncture.mp.  
 2 exp Acupuncture/  
 3 1 OR 2  
 4 exp Chronic disease/  
 5 chronic pain.mp.  
 6 4 OR 5  
 7 3 AND 6

Database: CINAHL

Search Strategy:

1 (MH "Acupuncture+")  
 2 (MH "Acupuncture Analgesia")  
 3 1 OR 2  
 4 (MH "Chronic Pain")  
 5 3 AND 4

Database: Cochrane Library

Search Strategy:

1 "acupuncture":ti,ab,kw  
 2 "acupuncture analgesia":ti,ab,kw

1  
2  
3 1 OR 2  
4 "chronic pain":ti,ab,kw  
5 3 AND 4  
6  
7

8 Database: Web of Science <1976 to July 2016>

9 Search Strategy:

10 1 acupuncture  
11 2 \*acupuncture\*  
12 3 1 OR 2  
13 4 chronic pain  
14 5 chronic \*pain\*  
15 6 4 OR 5  
16 7 3 AND 6  
17  
18  
19  
20  
21  
22  
23  
24  
25  
26  
27  
28  
29  
30  
31  
32  
33  
34  
35  
36  
37  
38  
39  
40  
41  
42  
43  
44  
45  
46  
47  
48  
49  
50  
51  
52  
53  
54  
55  
56  
57  
58  
59  
60

## PRISMA-P 2015 Checklist

This checklist has been adapted for use with protocol submissions to *Systematic Reviews* from Table 3 in Moher D et al: Preferred reporting items for systematic review and meta-analysis protocols (PRISMA-P) 2015 statement. *Systematic Reviews* 2015 4:1

| Section/topic                     | #  | Checklist item                                                                                                                                                                                  | Information reported     |                          | Page number(s) |
|-----------------------------------|----|-------------------------------------------------------------------------------------------------------------------------------------------------------------------------------------------------|--------------------------|--------------------------|----------------|
|                                   |    |                                                                                                                                                                                                 | Yes                      | No                       |                |
| <b>ADMINISTRATIVE INFORMATION</b> |    |                                                                                                                                                                                                 |                          |                          |                |
| <b>Title</b>                      |    |                                                                                                                                                                                                 |                          |                          |                |
| Identification                    | 1a | Identify the report as a protocol of a systematic review                                                                                                                                        | <input type="checkbox"/> |                          | 1              |
| Update                            | 1b | If the protocol is for an update of a previous systematic review, identify as such                                                                                                              |                          |                          | not applicable |
| <b>Registration</b>               | 2  | If registered, provide the name of the registry (e.g., PROSPERO) and registration number in the Abstract                                                                                        |                          |                          | not applicable |
| <b>Authors</b>                    |    |                                                                                                                                                                                                 |                          |                          |                |
| Contact                           | 3a | Provide name, institutional affiliation, and e-mail address of all protocol authors; provide physical mailing address of corresponding author                                                   | <input type="checkbox"/> |                          | 1              |
| Contributions                     | 3b | Describe contributions of protocol authors and identify the guarantor of the review                                                                                                             | <input type="checkbox"/> |                          | 10             |
| <b>Amendments</b>                 | 4  | If the protocol represents an amendment of a previously completed or published protocol, identify as such and list changes; otherwise, state plan for documenting important protocol amendments |                          | <input type="checkbox"/> | not applicable |
| <b>Support</b>                    |    |                                                                                                                                                                                                 |                          |                          |                |
| Sources                           | 5a | Indicate sources of financial or other support for the review                                                                                                                                   | <input type="checkbox"/> |                          | 10             |
| Sponsor                           | 5b | Provide name for the review funder and/or sponsor                                                                                                                                               |                          | <input type="checkbox"/> | not applicable |
| Role of sponsor/funder            | 5c | Describe roles of funder(s), sponsor(s), and/or institution(s), if any, in developing the protocol                                                                                              |                          | <input type="checkbox"/> | not applicable |
| <b>INTRODUCTION</b>               |    |                                                                                                                                                                                                 |                          |                          |                |
| <b>Rationale</b>                  | 6  | Describe the rationale for the review in the context of what is already known                                                                                                                   | <input type="checkbox"/> |                          | 5              |
| <b>Objectives</b>                 | 7  | Provide an explicit statement of the question(s) the review will address with reference to participants, interventions, comparators, and outcomes (PICO)                                        | <input type="checkbox"/> |                          | 5              |

| Section/topic                             | #   | Checklist item                                                                                                                                                                                                                              | Information reported     |    | Page number(s) |
|-------------------------------------------|-----|---------------------------------------------------------------------------------------------------------------------------------------------------------------------------------------------------------------------------------------------|--------------------------|----|----------------|
|                                           |     |                                                                                                                                                                                                                                             | Yes                      | No |                |
| <b>METHODS</b>                            |     |                                                                                                                                                                                                                                             |                          |    |                |
| <b>Eligibility criteria</b>               | 8   | Specify the study characteristics (e.g., PICO, study design, setting, time frame) and report characteristics (e.g., years considered, language, publication status) to be used as criteria for eligibility for the review                   | <input type="checkbox"/> |    | 5, 6           |
| <b>Information sources</b>                | 9   | Describe all intended information sources (e.g., electronic databases, contact with study authors, trial registers, or other grey literature sources) with planned dates of coverage                                                        | <input type="checkbox"/> |    | 5, 6           |
| <b>Search strategy</b>                    | 10  | Present draft of search strategy to be used for at least one electronic database, including planned limits, such that it could be repeated                                                                                                  | <input type="checkbox"/> |    | 5, 6           |
| <b>STUDY RECORDS</b>                      |     |                                                                                                                                                                                                                                             |                          |    |                |
| Data management                           | 11a | Describe the mechanism(s) that will be used to manage records and data throughout the review                                                                                                                                                | <input type="checkbox"/> |    | 7              |
| Selection process                         | 11b | State the process that will be used for selecting studies (e.g., two independent reviewers) through each phase of the review (i.e., screening, eligibility, and inclusion in meta-analysis)                                                 | <input type="checkbox"/> |    | 7              |
| Data collection process                   | 11c | Describe planned method of extracting data from reports (e.g., piloting forms, done independently, in duplicate), any processes for obtaining and confirming data from investigators                                                        | <input type="checkbox"/> |    | 7              |
| <b>Data items</b>                         | 12  | List and define all variables for which data will be sought (e.g., PICO items, funding sources), any pre-planned data assumptions and simplifications                                                                                       | <input type="checkbox"/> |    | 7              |
| <b>Outcomes and prioritization</b>        | 13  | List and define all outcomes for which data will be sought, including prioritization of main and additional outcomes, with rationale                                                                                                        | <input type="checkbox"/> |    | 7,8            |
| <b>Risk of bias in individual studies</b> | 14  | Describe anticipated methods for assessing risk of bias of individual studies, including whether this will be done at the outcome or study level, or both; state how this information will be used in data synthesis                        | <input type="checkbox"/> |    | 7              |
| <b>DATA</b>                               |     |                                                                                                                                                                                                                                             |                          |    |                |
| <b>Synthesis</b>                          | 15a | Describe criteria under which study data will be quantitatively synthesized                                                                                                                                                                 | <input type="checkbox"/> |    | 8, 9           |
|                                           | 15b | If data are appropriate for quantitative synthesis, describe planned summary measures, methods of handling data, and methods of combining data from studies, including any planned exploration of consistency (e.g., $I^2$ , Kendall's tau) | <input type="checkbox"/> |    | 8, 9           |
|                                           | 15c | Describe any proposed additional analyses (e.g., sensitivity or subgroup analyses, meta-regression)                                                                                                                                         | <input type="checkbox"/> |    | 9              |
|                                           | 15d | If quantitative synthesis is not appropriate, describe the type of summary planned                                                                                                                                                          | <input type="checkbox"/> |    | 9              |

1  
2  
3  
4  
5  
6  
7  
8  
9  
10  
11  
12  
13  
14  
15  
16  
17  
18  
19  
20  
21  
22  
23  
24  
25  
26  
27  
28  
29  
30  
31  
32  
33  
34  
35  
36  
37  
38  
39  
40  
41  
42  
43  
44  
45  
46  
47  
48  
49

| Section/topic                     | #  | Checklist item                                                                                                              | Information reported     |                          | Page number(s) |
|-----------------------------------|----|-----------------------------------------------------------------------------------------------------------------------------|--------------------------|--------------------------|----------------|
|                                   |    |                                                                                                                             | Yes                      | No                       |                |
| Meta-bias(es)                     | 16 | Specify any planned assessment of meta-bias(es) (e.g., publication bias across studies, selective reporting within studies) | <input type="checkbox"/> |                          | 7, 8           |
| Confidence in cumulative evidence | 17 | Describe how the strength of the body of evidence will be assessed (e.g., GRADE)                                            |                          | <input type="checkbox"/> | not applicable |

For peer review only

# BMJ Open

## USE OF IMPACT DOMAINS IN CLINICAL TRIALS OF ACUPUNCTURE FOR CHRONIC PAIN: A PROTOCOL FOR A METHODOLOGICAL SURVEY

|                                 |                                                                                                                                                                                                                                                                                             |
|---------------------------------|---------------------------------------------------------------------------------------------------------------------------------------------------------------------------------------------------------------------------------------------------------------------------------------------|
| Journal:                        | <i>BMJ Open</i>                                                                                                                                                                                                                                                                             |
| Manuscript ID                   | bmjopen-2016-014904.R2                                                                                                                                                                                                                                                                      |
| Article Type:                   | Protocol                                                                                                                                                                                                                                                                                    |
| Date Submitted by the Author:   | 25-Jun-2017                                                                                                                                                                                                                                                                                 |
| Complete List of Authors:       | Mazzei, Lauren; Universidade de Sorocaba, Programa de Pós-Graduação em Ciências Farmacêuticas<br>Bergamaschi, Cristiane; University of Sorocaba, Pharmaceutical Science<br>Silva, Marcus; Federal University of Amazonas, Clinical Epidemiology<br>Lopes, Luciane; UNISO, Pharmacie Science |
| <b>Primary Subject Heading</b>: | Research methods                                                                                                                                                                                                                                                                            |
| Secondary Subject Heading:      | Complementary medicine, Evidence based practice                                                                                                                                                                                                                                             |
| Keywords:                       | Acupuncture, Chronic Pain, Methodological Survey                                                                                                                                                                                                                                            |
|                                 |                                                                                                                                                                                                                                                                                             |

SCHOLARONE™  
Manuscripts

1  
2  
3 **USE OF IMPACT DOMAINS IN CLINICAL TRIALS OF ACUPUNCTURE**  
4 **FOR CHRONIC PAIN: A PROTOCOL FOR A METHODOLOGICAL SURVEY**  
5  
6

7 **Authors:** Lauren Giusti Mazzei<sup>1</sup>, Cristiane de Cássia Bergamaschi<sup>1</sup>, Marcus Tolentino  
8 Silva<sup>1</sup>, Luciane Cruz Lopes<sup>1</sup>  
9

10  
11 **Author affiliations**

12 <sup>1</sup> Pharmaceutical Sciences Graduate Program, University of Sorocaba, Sorocaba, State  
13 of São Paulo, Brazil  
14

15 Email address:

16 Lauren Giusti Mazzei [laurengmazzei@hotmail.com](mailto:laurengmazzei@hotmail.com)

17 Cristiane de Cássia Bergamaschi [cristiane.motta@prof.uniso.br](mailto:cristiane.motta@prof.uniso.br)

18 Marcus Tolentino Silva [marcusts@gmail.com](mailto:marcusts@gmail.com)

19 Luciane Cruz Lopes [luslopes@terra.com.br](mailto:luslopes@terra.com.br)  
20  
21

22 Corresponding author:

23 Luciane Cruz Lopes

24 Universidade de Sorocaba - UNISO

25 Rodovia Raposo Tavares, km 92.5, 18023-000

26 Sorocaba – SP, Brasil

27 Phone/Fax (15) 2101-7104  
28  
29

30 2588 words  
31  
32  
33  
34  
35  
36  
37  
38  
39  
40  
41  
42  
43  
44  
45  
46  
47  
48  
49  
50  
51  
52  
53  
54  
55  
56  
57  
58  
59  
60

## SUMMARY

**INTRODUCTION:** Pain is one of the most common and most debilitating complaints among patients. They affect the individual, their relationship with friends and family, their work force, and their sociability. Acupuncture is one of the therapeutic resources for managing chronic pain. Given the variability of outcome measures in Controlled Randomized Clinical Trials on Non-Oncologic Chronic Pain (CRCT-NOCP), the Initiative in Methods, Measurements and Pain Assessment in Clinical Trials (IMMPACT) recommends six domains to be covered in evaluating the effectiveness of treatments for chronic pain.

**OBJECTIVE:** The main objective of this study is to check whether methodological quality of outcome reporting in published trials have used IMMPACT recommendations in measuring CRCT-NOCP outcomes when acupuncture was used as a treatment.

**METHOD:** This is a methodological study. We will systematically search for eligible studies in specific database with a defined strategy. We are to use terms of MeSH “acupuncture”, “chronic pain” and its similar terms, without idiom restrictions. Eligible studies include those which randomized and chose NOCP patients to be treated with acupuncture or control (sham acupuncture or no acupuncture), recruited after September 2004, number of patients equal or more than 100. The measured outcomes are to be the presence of outcome domains recommended by IMMPACT, domains reported by patient or clinician, tools used to measure such domains, besides other features of the studies. We shall conduct a regression analysis to explore factors which can be associated with the presence of outcome domains according to IMMPACT recommendations.

**ETHICS AND DISSEMINATION:** This survey will be submitted to presentation in congresses and publishing in a scientific journal. The evidence obtained in this study will allow us to measure the quality of the evidence and greater transparency in decisions regarding the use of acupuncture as a viable alternative to managing chronic pain.

**Keywords:** Acupuncture. Chronic Pain. Methodological Survey.

### Strong Points and Limitations of this Study

- ✓ This is the first study to evaluate the outcome domains used in CRCT using acupuncture as intervention to the treatment of NOCP.



- ✓ Acupuncture can be an effective therapy in chronic pain control, avoiding costly expenses with analgesic medication which generate dependence (opioids), or limiting adverse effects as in the case of non-steroid anti-inflammatories (gastric ulcer and cardiovascular events) that have a direct impact in the patient's life. Therefore, checking compliance with IMMPACT recommendations in CRCT about NOCP may appraise the quality of the evidence and provide greater transparency in decisions regarding the use of acupuncture as a viable alternative in this clinical condition. It can also guide physicians in clinical practice decision making.
- ✓ The methods contain explicit eligibility criteria, a comprehensive research and a double independent selection, including independent appraisal of bias risk.
- ✓ Primary studies are probably limited in conception and outcome measures and thus, they have high bias risk. Besides, techniques or point categories used in acupuncture may be uncertain or varied in different studies.
- ✓ This enquiry has not received any specific sponsorship from any public, private or non-profit agency.

## INTRODUCTION

Non-Oncologic Chronic Pain (NOCP) is defined as a persisting painful feeling for more than some months, which may be associated to traumas and illnesses or not. [1] It is estimated that 18, 9% of the world population present chronic pain. It is one of the most common complaints among patients, affecting not only the subject in their individuality, but also in a general way. [2]

It is regarded as a health problem that consumes 22% of primary health appointments on average. In the United States, costs with pain medication are around US\$17, 8 billion a year. [3] In Canada the average cost is of \$ 1,462 per individual monthly with chronic pain on waiting lists [4] and of € 1,883.30 per individual, adult in Portugal. [5]

Acupuncture is one of the resources that compose the National Policy of Integrated and Supplementary Practices (NPISP) IN Brazil. It is a possible therapy in managing chronic pain with sensitive cost reduction to the government and adverse effect reduction to the patient. [6] The World Health Organization (WHO) has launched

1  
2  
3 a strategy for the period 2014-2023 to integrate to traditional medicine and supplement  
4 the health system in a safe, respectful, accessible and effective way. [7]

5  
6 The search for international guidelines approaching the use of acupuncture for  
7 NOCP in the adult population results in few findings or in conflicting recommendations.  
8 Acupuncture is recommended as an adjunct to conventional treatment of NOCP, but  
9 only the American guidelines specify the moment in which it should be used within the  
10 conventional drug treatment flow. [8] [9] [10] [2]

11  
12 Among the policies we looked up, the recommendation of acupuncture for many  
13 painful conditions is based on low quality evidence due to the diversity in the  
14 methodology of CRCT. [2 8-10] Besides this, such guidelines do not discriminate the  
15 power of the recommendation, except for those in Scotland and Canada. [2 8]

16  
17 Even showing quality, CRCT with adequate randomization and blinding may not  
18 provide the best approach for the development of strong evidence base for managing  
19 pain, in case the outcomes and its tools are not adequate. [11] Such limitations have  
20 been recognized internationally, leading to the development of the Initiative on  
21 Methods, Measurements and Pain Assessment in Clinical Trials (IMMPACT) in 2002.

22  
23 The initiative gathered 27 experts from universities, governmental agencies and  
24 pharmaceutical industry, who identified consensually a nucleus of six outcome domains  
25 that should be considered in CRCT for chronic pain. [12] The outcome domains  
26 considered were: (1) pain; (2) physical function; (3) emotional state; (4) evaluation of  
27 the participants regarding improvement and satisfaction with treatment; (5) adverse  
28 symptoms; and (6) the participant's willingness, but the first four domains listed as  
29 main. [13]

30  
31 The establishment of a standard set of outcome domains in CRCT about chronic  
32 pain encourages researchers to consider chronic pain as a complex phenomenon which  
33 affects patients in multiple dimensions. It protects against the polarization of selective  
34 outcomes, a common problem in all medical literature. It makes systematic reviews and  
35 Meta analyses easier, which allows researchers to generate more precise estimations of  
36 treatment effects due to sharing common outcomes of individual trials. [14]

37  
38 Variability in outcome measures in CRCT about NOCP generates inaccuracies  
39 in the effectiveness of certain treatments. Although the recommendation of IMMPACT  
40 was published in 2003 and updated in 2008, there is no information on whether  
41 subsequent clinical trials published comply with IMMPACT recommendations on their  
42 outcome measures.

1  
2  
3 The general aim of this project is to verify whether methodological quality of outcome  
4 reporting in published trials have used IMMPACT recommendations in measuring  
5 CRCT-NOCP outcomes which were executed as of September 2004 when acupuncture  
6 was used as a treatment.  
7  
8  
9

## 10 11 **METHODS**

### 12 13 14 **Study Design**

15 The study comprises a methodological survey of randomized clinical trials which used  
16 acupuncture for the treatment of chronic pain. The methodological survey is a type of  
17 study on method enquiry, with data collection form selected CRCT, not based on  
18 questionnaires but using systematic methods in its execution.  
19  
20  
21  
22  
23

### 24 25 26 **Research question**

27  
28 The question that guides this study was formulated using the PICO strategy,  
29 which represents an acronym for Patient, Intervention, Comparison and Outcomes. In  
30 evidence-based practice, these four components are the fundamental elements of the  
31 research question and the construction of the question for the bibliographic search for  
32 evidence. Adequate research question allows the correct definition of what information  
33 (evidence) is necessary to solve the clinical research question, maximizes the retrieval  
34 of evidence in the databases, focuses the scope of the research and avoids unnecessary  
35 searches. [15]  
36  
37  
38  
39  
40  
41

42 Using the PICO strategy, the question of this survey was: RCT with individuals  
43 with Non-Oncologic Chronic Pain (*population*) treated with acupuncture (*intervention*),  
44 and where the comparator used was acupuncture sham or not acupuncture (*comparison*),  
45 they reported the domains of IMMPACT recommendations (*outcome*)?  
46  
47  
48  
49  
50  
51

### 52 53 54 **Reference Sources and Search**

55 All trials already included in CRCT-NOCP, published as of September 2004,  
56 selected in the systematic review carried out by Vickers et al. [16] Additional research  
57  
58  
59  
60

1  
2  
3 will be performed in studies dating as from January 2011 and 6 months before the  
4 systematic review of the comprehensive search date on the theme (considering delay in  
5 indexing) to nowadays. The search for eligible studies will be accomplished by  
6 systematic research of database, namely Lilacs, CINAHL, EMBASE, MEDLINE,  
7 AMED, Web of Science, Clinical Trials and Cochrane Central Registry of Controlled  
8 Trials, with a defined search strategy, free of idiom restriction.  
9  
10  
11  
12

13  
14 We shall combine the main terms “Chronic Pain” and “Acupuncture” indexed in  
15 the MeSH system. Firstly, we will search the isolate terms and their synonyms, and then  
16 we will make a second search, combining and crossing the terms. Appendix A, Table 1.  
17  
18  
19

20  
21 We will verify the reference or citation list found in secondary studies to identify  
22 possibly eligible studies. When necessary, we shall contact the authors of the main  
23 studies to obtain further information.  
24  
25  
26

### 27 **Study Eligibility Criteria**

28  
29  
30 The eligibility criteria for this study will be the same as those adopted in the  
31 systematic review published in 2012.  
32

33  
34 Design: controlled randomized clinical trials, whose patient recruitment occurred  
35 from September 2004 and whose number of patients is equal or more than 100.  
36

37  
38 Clinical condition: studies which include patients aged 18 or older, with non-  
39 oncologic chronic pain. Eligible pain conditions: Osteoarthritis, chronic or recurrent  
40 headaches, specific and nonspecific shoulder pains, and nonspecific back or neck pain.  
41 For osteoarthritis or headaches, it will not be necessary the duration of the pain, since  
42 both are of a chronic nature. For pain in the shoulder, back and neck, the pain episode  
43 should be at least four weeks in duration.  
44  
45  
46

47  
48 Intervention: the studies should include a group of patients treated with  
49 acupuncture, where acupuncture points or trigger points were stimulated with  
50 acupuncture needles, and another group where patients were treated with sham  
51 acupuncture or no acupuncture, and studies where the choice blinding is unmistakable  
52 and adequate.  
53  
54  
55  
56  
57  
58  
59  
60

1  
2  
3 *Exclusion Criteria:* The following trials are to be excluded: neck or back pains  
4 associated with specific clinical conditions (e.g., fractures resulting from osteoporosis).  
5  
6

### 7 **Determination of Eligibility**

8  
9 Two reviewers, in pairs, will evaluate independently whether summaries and  
10 titles are according to the eligibility criteria. Differences are to be solved by consensus  
11 among all reviewers. To assess the agreement of the selection we will use Kappa Test,  
12 given that kappa values between 0,40 and 0,59 are to be considered weak agreement,  
13 between 0,60 and 0,74 medium agreement, and 0,75 or more excellent agreement.  
14  
15  
16  
17

18  
19 In order to exclude doubled articles, one reviewer will analyze all the eligible  
20 articles and identify those which have one or more authors in common. In case of  
21 doubled publication, we will use the article with most complete data.  
22  
23  
24

### 25 **Data Extraction**

26  
27 We will adopt an Excel spreadsheet for the abstraction of data, to be used by two  
28 reviewers separately. A third reviewer will check the Excel spreadsheet to ensure the  
29 coherence of the answers obtained among collaborators and use the consensus when  
30 necessary.  
31  
32  
33

34 For articles published only in summary or for those with important information  
35 missing, we will look for complete information about methods and results by contacting  
36 the authors.  
37  
38

39 Two reviewers will be calibrated by the extraction of at least three articles and  
40 next, will perform the consensus, in pairs and independently. This procedure shall occur  
41 until reviewers are able to extract the data. The collected data will be: name of the first  
42 author, date of publication, country of origin, impact of the journal, recruitment date of  
43 the first participant, presence of outcome domains IMMPACT, and the tools used for  
44 measuring the outcome domains, method of acupuncture, clinical condition of the  
45 patient, duration of treatment. Besides this, the study will check if fundamental  
46 outcomes are reported by the patient (ORP), if clinical outcomes are reported (COR), if  
47 the outcome was reported by a third person (ORT), or a combination of the items above.  
48  
49  
50  
51  
52  
53  
54  
55  
56  
57  
58  
59  
60

1  
2  
3 The data will be recorded to be transferred to a statistical analysis program later.  
4 A regression analysis will be conducted to explore factors that may be associated with  
5 the presence of outcome domains according to IMMPACT recommendations.  
6  
7  
8

### 9 10 **Risk of Bias**

11 A modified version of Cochrane for risk of bias will be used. [14 17] Reviewers  
12 will evaluate the risk of bias for each randomized trial independently, according to the  
13 following criteria: generation of random sequence, hiding of the choices, blinding of  
14 participants and professionals, blinding of outcome evaluators, if outcomes were  
15 reported adequately; incomplete outcomes; selective outcome reporting and other  
16 sources of bias. Reviewers will attribute answer alternatives “definitely yes”, “probably  
17 yes”, “probably not” and “definitely not” for each of the domains. [18] Ultimately,  
18 “definitely yes” and “probably yes” will be attributed low risk of bias, whereas  
19 “definitely not” and “probably not” mean high risk of bias. Reviewers will solve  
20 divergences through discussion, and a third person will judge unsolved divergences.  
21  
22  
23  
24  
25  
26  
27  
28

### 29 **Definitions of IMMPACT outcome domain**

30 The four IMMPACT domains recommended in 2003 and 2008 which will be  
31 captured in this study are listed below, together with their definitions  
32  
33

34 1. Pain: Includes various aspects of pain evaluation (e.g., intensity of pain,  
35 duration and frequency). The global evaluation of pain is a general assessment which  
36 examines how the pain changed during the treatment.  
37  
38

39 2. Physical function: refers to the participant’s capacity to conduct their daily  
40 activities (e.g., tasks, walks, trips and self-care), strength and resistance.  
41  
42

43 3. Emotional state: refers to the treatment associated to emotional anguish (e.g.,  
44 depression, anxiety, anger or irritability).  
45

46 4. Patient’s classification of improvement and satisfaction with the treatment:  
47 refers to the participant’s feeling with the treatment (that is, if they feel the positive  
48 features of the treatment surpass the negative ones). This domain overcomes pain  
49 classification only.  
50  
51  
52  
53  
54  
55  
56  
57  
58  
59  
60

## Statistical Analysis

The statistical analyzes carried out in this survey will aim to identify the factors associated with the change in reporting or adherence to the IMMPACT recommendations, in RCT made since its publication.

The descriptive part includes year of publication, place of study, factor of impact of the journal and items of evaluation of methodological quality. These factors will be highlighted as they may influence the adherence of the IMMPACT recommendations. Afterwards, the frequency of measurement of pain, physical function, emotional state and patient satisfaction improvement will be described according to the IMMPACT recommendations.

Thereafter, for each domain, the measurement method is quantized, that is, whether the pain was measured by VAS and / or VAN, whether physical function was measured by multidimensional inventory to pain and / or inventory summary of the pain, whether the emotional state was measured by the Beck depression inventory and / or mood state profile, and whether the improvement in patient satisfaction was measured by the patient's overall impression of change. The correct applicability of the instrument will also be quantified (if the domain report was executed by the patient, clinical or third parties). Finally, compliance with IMMPACT will be measured by the attendance of the four domains. It is also planned to quantify the number of IMMPACT domains that will be served, in order to generate a score between 0-4 points. The score will be described on average, standard deviation, median and interquartile range.

A score of 0 will be given when the study does not report any of the domains recommended by IMMPACT, score 1, when reporting only one of the recommended domains; Score 2 when reporting two of the recommended domains; Score 3, when reporting three of the recommended domains; and score 4 when reporting the four major domains recommended by IMMPACT.

The factors associated with compliance with the areas of IMMPACT will be investigated. For this, a logistic regression will be performed considering the domains of IMMPACT as dependent variables and the characteristics of the study as independent variables (year of publication, place of study, periodic impact factor and items of methodological quality evaluation). For a good regression analysis, a minimum of 10 references is necessary, which will not be a problem since we will include previous SR



1  
2  
3 studies. The results will be expressed in Odds Ratio with respective 95% confidence  
4 intervals.  
5

6 Factors associated with the IMMPACT score will also be investigated.  
7 Depending on the data distribution, analysis of variance (ANOVA) or Kruskal Wallis  
8 will be performed. A significant statistical difference will be attributed to cases of p  
9  $\leq 0.05$ .  
10  
11

12 Sensitivity analysis will be performed for all calculations, by means of a  
13 bootstrap technique, which will verify the consistency and robustness of the findings.  
14 [19] All calculations will run in STATA 14.2.  
15  
16  
17

## 18 19 **DISCUSSION**

20  
21 Our survey will evaluate methodologically the outcomes of RCT which used  
22 acupuncture for NOCP. We will check whether methodological quality of outcome  
23 reporting in published trials have used IMMPACT recommendations in measuring  
24 CRCT-NOCP outcomes when acupuncture was used as a treatment.. Our survey's  
25 outcomes will be significant for public health and for health professionals all over the  
26 world, mainly in Brazil.  
27  
28  
29

30 Since the publication of IMMPACT, it is not known whether studies using  
31 acupuncture as an intervention for chronic pain follow IMMPACT's recommendations.  
32 Without consistent and more thorough standard outcome reports for patients in CRCT  
33 and NOCP, the authors of such studies will be unable to judge objectively the effects of  
34 acupuncture. The data compiled on the use of acupuncture will inform both patients and  
35 health professionals about its efficacy and safety. Therefore, multiprofessional care and  
36 decision-making based on evidence will be made easier.  
37  
38  
39

40 This Project aims at exploring some hypotheses to determine the use of  
41 IMMPACT recommendations on CRCT-NOCP. After the publication of IMMPACT  
42 orientations in August 2003 and later, in 2008, CRCT-NOCP which started recruiting  
43 participants as from September 2004 had better reports of main outcomes, regarding  
44 IMMPACT domains versus journals with lower impact factors. The main domains were  
45 reported by the patient, by the clinician, by a third person or by a combination of these  
46 subjects.  
47  
48  
49  
50  
51  
52  
53  
54  
55  
56  
57  
58  
59  
60



## ETHICS AND DIFUSION

Ethics is not necessary, as this is protocol for a methodological survey. The survey will be published in a journal and presented in congresses with reviews by peers. The evidence of this study will allow health professionals to verify the efficacy and safety of acupuncture for the treatment of NOCP. Updates of this study should be conducted to inform and orient the practice of health care.

**Contributors:** LCL is the main researcher who led the writing of the manuscript. CCB and LGM are the project manager, co-researcher, who contributed to and writing and review of the manuscript. MTS is co-researcher, and contributed to the writing and review of the manuscript. All the authors have read and approved of the final manuscript.

**Acknowledgments:** The authors thank Dr. Caio Guimarães for his expert advice.

**Sponsorship:** This Project has not received any specific funding of any public, private or non-profit agency.

**Interest conflict:** None.

## REFERENCES

1. Ontario RNAo. Assessment and management of pain. 3<sup>a</sup> ed. Dez/2013 ed. Rockville MD: Agency for Healthcare Research and Quality (AHRQ), 2013.
2. SIGN SIGN. Management of chronic pain. A national clinical guideline. Secondary Management of chronic pain. A national clinical guideline 2013. <http://www.guideline.gov/content.aspx?id=47707&search=chronic+pain>.
3. Rasu RS, Vouthy K, Crowl AN, et al. Cost of pain medication to treat adult patients with nonmalignant chronic pain in the United States. Journal of managed care & specialty pharmacy 2014;**20**(9):921-8 doi: 10.18553/jmcp.2014.20.9.921[published Online First: Epub Date]].
4. Guerriere DN, Choiniere M, Dion D, et al. The Canadian STOP-PAIN project - Part 2: What is the cost of pain for patients on waitlists of multidisciplinary pain treatment facilities? Canadian journal of anaesthesia = Journal canadien d'anesthesie 2010;**57**(6):549-58 doi: 10.1007/s12630-010-9306-4[published Online First: Epub Date]].
5. Azevedo LF, Costa-Pereira A, Mendonca L, Dias CC, Castro-Lopes JM. The economic impact of chronic pain: a nationwide population-based cost-of-illness study in Portugal. The European journal of health economics : HEPAC : health economics in prevention and care 2016;**17**(1):87-98 doi: 10.1007/s10198-014-0659-4[published Online First: Epub Date]].
6. Brasil. Política Nacional de Práticas Integrativas e Complementares no SUS. Ministério da Saúde 2006;**DOU – seção 1**
7. Salud OMDI. Estrategia de la OMS sobre medicina tradicional 2014-2023. 2013
8. Ontario CoPaSo. Evidence-based recommendations for medical management of chronic non-malignant pain. . CPSO 2000
9. Practice guidelines for chronic pain management: an updated report by the American Society of Anesthesiologists Task Force on Chronic Pain Management and the American Society of Regional Anesthesia and Pain Medicine. Anesthesiology 2010;**112**(4):810-33
10. National Guideline C. Assessment and management of chronic pain. Secondary Assessment and management of chronic pain 2011. <http://www.guideline.gov/content.aspx?id=47646&search=assessment+and+management+of+chronic+pain>.
11. Dworkin RH, Turk DC, Peirce-Sandner S, et al. Research design considerations for confirmatory chronic pain clinical trials: IMMPACT recommendations. Pain 2010;**149**(2):177-93 doi: 10.1016/j.pain.2010.02.018[published Online First: Epub Date]].
12. Turk DC, Dworkin RH, Allen RR, et al. Core outcome domains for chronic pain clinical trials: IMMPACT recommendations. Pain 2003;**106**(3):337-45
13. Dworkin RH, Turk DC, Farrar JT, et al. Core outcome measures for chronic pain clinical trials: IMMPACT recommendations. Pain 2005;**113**(1-2):9-19 doi: 10.1016/j.pain.2004.09.012[published Online First: Epub Date]].
14. Higgins JP GS. Cochrane handbook for systematic reviews of interventions, version [5.1.0](updated March 2011). The Cochrane Collaboration 2011
15. Santos CMdC, Pimenta CAdM, Nobre MRC. The PICO strategy for the research question construction and evidence search. Revista Latino-Americana de Enfermagem 2007;**15**:508-11

- 1
- 2
- 3
- 4 16. Vickers AJ, Cronin AM, Maschino AC, et al. Acupuncture for chronic pain: individual
- 5 patient data meta-analysis. Archives of internal medicine 2012;**172**(19):1444-53 doi:
- 6 10.1001/archinternmed.2012.3654[published Online First: Epub Date].
- 7
- 8 17. Akl EA, Sun X, Busse JW, et al. Specific instructions for estimating unclearly reported
- 9 blinding status in randomized trials were reliable and valid. Journal of clinical
- 10 epidemiology 2012;**65**(3):262-7 doi: 10.1016/j.jclinepi.2011.04.015[published Online
- 11 First: Epub Date].
- 12
- 13 18. Busse J, Guyatt G. Modification of Cochrane Tool to assess risk of bias in randomized
- 14 trials. , 2013.
- 15
- 16 19. Henderson AR. The bootstrap: a technique for data-driven statistics. Using computer-
- 17 intensive analyses to explore experimental data. Clinica chimica acta; international
- 18 journal of clinical chemistry 2005;**359**(1-2):1-26 doi:
- 19 10.1016/j.cccn.2005.04.002[published Online First: Epub Date].
- 20
- 21
- 22
- 23
- 24
- 25
- 26
- 27
- 28
- 29
- 30
- 31
- 32
- 33
- 34
- 35
- 36
- 37
- 38
- 39
- 40
- 41
- 42
- 43
- 44
- 45
- 46
- 47
- 48
- 49
- 50
- 51
- 52
- 53
- 54
- 55
- 56
- 57
- 58
- 59
- 60

## Appendix A

Table 1. Search Strategy for database

Database: Ovid MEDLINE(R) In-Process & Other Non-Indexed Citations, Ovid MEDLINE(R) Daily and Ovid MEDLINE(R) <1946 to Present>

Search Strategy:

1 exp Acupuncture Analgesia/  
 2 exp Acupuncture/  
 3 acupuncture.mp.  
 4 1 OR 2 OR 3  
 5 chronic pain.mp.  
 6 exp Chronic Pain/  
 7 exp Chronic Disease/  
 8 5 OR 6 OR 7  
 9 4 AND 8

Database: Embase <1974 to 2016 June 28>

Search Strategy:

1 exp acupuncture analgesia/  
 2 acupuncture.mp.  
 3 exp acupuncture/  
 4 1 OR 2 OR 3  
 5 exp chronic pain/  
 6 chronic pain.mp.  
 7 5 OR 6  
 8 4 AND 7

Database: AMED (Allied and Complementary Medicine) <1985 to June 2016>

Search Strategy:

1 acupuncture.mp.  
 2 exp Acupuncture/  
 3 1 OR 2  
 4 exp Chronic disease/  
 5 chronic pain.mp.  
 6 4 OR 5  
 7 3 AND 6

Database: CINAHL

Search Strategy:

1 (MH "Acupuncture+")  
 2 (MH "Acupuncture Analgesia")  
 3 1 OR 2  
 4 (MH "Chronic Pain")  
 5 3 AND 4

Database: Cochrane Library

Search Strategy:

1 "acupuncture":ti,ab,kw  
 2 "acupuncture analgesia":ti,ab,kw

1  
2  
3 1 OR 2  
4 "chronic pain":ti,ab,kw  
5 3 AND 4  
6  
7

8 Database: Web of Science <1976 to July 2016>

9 Search Strategy:

10 1 acupuncture  
11 2 \*acupuncture\*  
12 3 1 OR 2  
13 4 chronic pain  
14 5 chronic \*pain\*  
15 6 4 OR 5  
16 7 3 AND 6  
17  
18  
19  
20  
21  
22  
23  
24  
25  
26  
27  
28  
29  
30  
31  
32  
33  
34  
35  
36  
37  
38  
39  
40  
41  
42  
43  
44  
45  
46  
47  
48  
49  
50  
51  
52  
53  
54  
55  
56  
57  
58  
59  
60

## PRISMA-P 2015 Checklist

This checklist has been adapted for use with protocol submissions to *Systematic Reviews* from Table 3 in Moher D et al: Preferred reporting items for systematic review and meta-analysis protocols (PRISMA-P) 2015 statement. *Systematic Reviews* 2015 4:1

| Section/topic                     | #  | Checklist item                                                                                                                                                                                  | Information reported     |                          | Page number(s) |
|-----------------------------------|----|-------------------------------------------------------------------------------------------------------------------------------------------------------------------------------------------------|--------------------------|--------------------------|----------------|
|                                   |    |                                                                                                                                                                                                 | Yes                      | No                       |                |
| <b>ADMINISTRATIVE INFORMATION</b> |    |                                                                                                                                                                                                 |                          |                          |                |
| <b>Title</b>                      |    |                                                                                                                                                                                                 |                          |                          |                |
| Identification                    | 1a | Identify the report as a protocol of a systematic review                                                                                                                                        | <input type="checkbox"/> |                          | 1              |
| Update                            | 1b | If the protocol is for an update of a previous systematic review, identify as such                                                                                                              |                          |                          | not applicable |
| <b>Registration</b>               | 2  | If registered, provide the name of the registry (e.g., PROSPERO) and registration number in the Abstract                                                                                        |                          |                          | not applicable |
| <b>Authors</b>                    |    |                                                                                                                                                                                                 |                          |                          |                |
| Contact                           | 3a | Provide name, institutional affiliation, and e-mail address of all protocol authors; provide physical mailing address of corresponding author                                                   | <input type="checkbox"/> |                          | 1              |
| Contributions                     | 3b | Describe contributions of protocol authors and identify the guarantor of the review                                                                                                             | <input type="checkbox"/> |                          | 10             |
| <b>Amendments</b>                 | 4  | If the protocol represents an amendment of a previously completed or published protocol, identify as such and list changes; otherwise, state plan for documenting important protocol amendments |                          | <input type="checkbox"/> | not applicable |
| <b>Support</b>                    |    |                                                                                                                                                                                                 |                          |                          |                |
| Sources                           | 5a | Indicate sources of financial or other support for the review                                                                                                                                   | <input type="checkbox"/> |                          | 10             |
| Sponsor                           | 5b | Provide name for the review funder and/or sponsor                                                                                                                                               |                          | <input type="checkbox"/> | not applicable |
| Role of sponsor/funder            | 5c | Describe roles of funder(s), sponsor(s), and/or institution(s), if any, in developing the protocol                                                                                              |                          | <input type="checkbox"/> | not applicable |
| <b>INTRODUCTION</b>               |    |                                                                                                                                                                                                 |                          |                          |                |
| <b>Rationale</b>                  | 6  | Describe the rationale for the review in the context of what is already known                                                                                                                   | <input type="checkbox"/> |                          | 5              |
| <b>Objectives</b>                 | 7  | Provide an explicit statement of the question(s) the review will address with reference to participants, interventions, comparators, and outcomes (PICO)                                        | <input type="checkbox"/> |                          | 5              |

| Section/topic                             | #   | Checklist item                                                                                                                                                                                                                              | Information reported     |    | Page number(s) |
|-------------------------------------------|-----|---------------------------------------------------------------------------------------------------------------------------------------------------------------------------------------------------------------------------------------------|--------------------------|----|----------------|
|                                           |     |                                                                                                                                                                                                                                             | Yes                      | No |                |
| <b>METHODS</b>                            |     |                                                                                                                                                                                                                                             |                          |    |                |
| <b>Eligibility criteria</b>               | 8   | Specify the study characteristics (e.g., PICO, study design, setting, time frame) and report characteristics (e.g., years considered, language, publication status) to be used as criteria for eligibility for the review                   | <input type="checkbox"/> |    | 5, 6           |
| <b>Information sources</b>                | 9   | Describe all intended information sources (e.g., electronic databases, contact with study authors, trial registers, or other grey literature sources) with planned dates of coverage                                                        | <input type="checkbox"/> |    | 5, 6           |
| <b>Search strategy</b>                    | 10  | Present draft of search strategy to be used for at least one electronic database, including planned limits, such that it could be repeated                                                                                                  | <input type="checkbox"/> |    | 5, 6           |
| <b>STUDY RECORDS</b>                      |     |                                                                                                                                                                                                                                             |                          |    |                |
| Data management                           | 11a | Describe the mechanism(s) that will be used to manage records and data throughout the review                                                                                                                                                | <input type="checkbox"/> |    | 7              |
| Selection process                         | 11b | State the process that will be used for selecting studies (e.g., two independent reviewers) through each phase of the review (i.e., screening, eligibility, and inclusion in meta-analysis)                                                 | <input type="checkbox"/> |    | 7              |
| Data collection process                   | 11c | Describe planned method of extracting data from reports (e.g., piloting forms, done independently, in duplicate), any processes for obtaining and confirming data from investigators                                                        | <input type="checkbox"/> |    | 7              |
| <b>Data items</b>                         | 12  | List and define all variables for which data will be sought (e.g., PICO items, funding sources), any pre-planned data assumptions and simplifications                                                                                       | <input type="checkbox"/> |    | 7              |
| <b>Outcomes and prioritization</b>        | 13  | List and define all outcomes for which data will be sought, including prioritization of main and additional outcomes, with rationale                                                                                                        | <input type="checkbox"/> |    | 7,8            |
| <b>Risk of bias in individual studies</b> | 14  | Describe anticipated methods for assessing risk of bias of individual studies, including whether this will be done at the outcome or study level, or both; state how this information will be used in data synthesis                        | <input type="checkbox"/> |    | 7              |
| <b>DATA</b>                               |     |                                                                                                                                                                                                                                             |                          |    |                |
| <b>Synthesis</b>                          | 15a | Describe criteria under which study data will be quantitatively synthesized                                                                                                                                                                 | <input type="checkbox"/> |    | 8, 9           |
|                                           | 15b | If data are appropriate for quantitative synthesis, describe planned summary measures, methods of handling data, and methods of combining data from studies, including any planned exploration of consistency (e.g., $I^2$ , Kendall's tau) | <input type="checkbox"/> |    | 8, 9           |
|                                           | 15c | Describe any proposed additional analyses (e.g., sensitivity or subgroup analyses, meta-regression)                                                                                                                                         | <input type="checkbox"/> |    | 9              |
|                                           | 15d | If quantitative synthesis is not appropriate, describe the type of summary planned                                                                                                                                                          | <input type="checkbox"/> |    | 9              |

| Section/topic                     | #  | Checklist item                                                                                                              | Information reported     |                          | Page number(s) |
|-----------------------------------|----|-----------------------------------------------------------------------------------------------------------------------------|--------------------------|--------------------------|----------------|
|                                   |    |                                                                                                                             | Yes                      | No                       |                |
| Meta-bias(es)                     | 16 | Specify any planned assessment of meta-bias(es) (e.g., publication bias across studies, selective reporting within studies) | <input type="checkbox"/> |                          | 7, 8           |
| Confidence in cumulative evidence | 17 | Describe how the strength of the body of evidence will be assessed (e.g., GRADE)                                            |                          | <input type="checkbox"/> | not applicable |

For peer review only



# BMJ Open

## USE OF IMPACT DOMAINS IN CLINICAL TRIALS OF ACUPUNCTURE FOR CHRONIC PAIN: A PROTOCOL FOR A METHODOLOGICAL SURVEY

|                                 |                                                                                                                                                                                                                                                                                             |
|---------------------------------|---------------------------------------------------------------------------------------------------------------------------------------------------------------------------------------------------------------------------------------------------------------------------------------------|
| Journal:                        | <i>BMJ Open</i>                                                                                                                                                                                                                                                                             |
| Manuscript ID                   | bmjopen-2016-014904.R3                                                                                                                                                                                                                                                                      |
| Article Type:                   | Protocol                                                                                                                                                                                                                                                                                    |
| Date Submitted by the Author:   | 02-Aug-2017                                                                                                                                                                                                                                                                                 |
| Complete List of Authors:       | Mazzei, Lauren; Universidade de Sorocaba, Programa de Pós-Graduação em Ciências Farmacêuticas<br>Bergamaschi, Cristiane; University of Sorocaba, Pharmaceutical Science<br>Silva, Marcus; Federal University of Amazonas, Clinical Epidemiology<br>Lopes, Luciane; UNISO, Pharmacie Science |
| <b>Primary Subject Heading</b>: | Research methods                                                                                                                                                                                                                                                                            |
| Secondary Subject Heading:      | Complementary medicine, Evidence based practice                                                                                                                                                                                                                                             |
| Keywords:                       | Acupuncture, Chronic Pain, Methodological Survey                                                                                                                                                                                                                                            |
|                                 |                                                                                                                                                                                                                                                                                             |

SCHOLARONE™  
Manuscripts

1  
2  
3 **USE OF IMPACT DOMAINS IN CLINICAL TRIALS OF ACUPUNCTURE**  
4 **FOR CHRONIC PAIN: A PROTOCOL FOR A METHODOLOGICAL SURVEY**  
5  
6

7 **Authors:** Lauren Giusti Mazzei<sup>1</sup>, Cristiane de Cássia Bergamaschi<sup>1</sup>, Marcus Tolentino  
8 Silva<sup>1</sup>, Luciane Cruz Lopes<sup>1</sup>  
9

10  
11 **Author affiliations**

12 <sup>1</sup> Pharmaceutical Sciences Graduate Program, University of Sorocaba, Sorocaba, State  
13 of São Paulo, Brazil  
14

15 Email address:

16 Lauren Giusti Mazzei [laurengmazzei@hotmail.com](mailto:laurengmazzei@hotmail.com)

17 Cristiane de Cássia Bergamaschi [cristiane.motta@prof.uniso.br](mailto:cristiane.motta@prof.uniso.br)

18 Marcus Tolentino Silva [marcusts@gmail.com](mailto:marcusts@gmail.com)

19 Luciane Cruz Lopes [luslopes@terra.com.br](mailto:luslopes@terra.com.br)  
20  
21

22 Corresponding author:

23 Luciane Cruz Lopes

24 Universidade de Sorocaba - UNISO

25 Rodovia Raposo Tavares, km 92.5, 18023-000

26 Sorocaba – SP, Brasil

27 Phone/Fax (15) 2101-7104  
28  
29

30 2588 words  
31  
32  
33  
34  
35  
36  
37  
38  
39  
40  
41  
42  
43  
44  
45  
46  
47  
48  
49  
50  
51  
52  
53  
54  
55  
56  
57  
58  
59  
60

## SUMMARY

**INTRODUCTION:** Pain is one of the most common and most debilitating complaints among patients. They affect the individual, their relationship with friends and family, their work force, and their sociability. Acupuncture is one of the therapeutic resources for managing chronic pain. Given the variability of outcome measures in Controlled Randomized Clinical Trials on Non-Oncologic Chronic Pain (CRCT-NOCP), the Initiative in Methods, Measurements and Pain Assessment in Clinical Trials (IMMPACT) recommends six domains to be covered in evaluating the effectiveness of treatments for chronic pain.

**OBJECTIVE:** The main objective of this study is to check whether methodological quality of outcome reporting in published trials have used IMMPACT recommendations in measuring CRCT-NOCP outcomes when acupuncture was used as a treatment.

**METHOD:** This is a methodological study. We will systematically search for eligible studies in specific database with a defined strategy. We are to use terms of MeSH “acupuncture”, “chronic pain” and its similar terms, without idiom restrictions. Eligible studies include those which randomized and chose NOCP patients to be treated with acupuncture or control (sham acupuncture or no acupuncture), recruited after September 2004, number of patients equal or more than 100. The measured outcomes are to be the presence of outcome domains recommended by IMMPACT, domains reported by patient or clinician, tools used to measure such domains, besides other features of the studies. We shall conduct a regression analysis to explore factors which can be associated with the presence of outcome domains according to IMMPACT recommendations.

**ETHICS AND DISSEMINATION:** This survey will be submitted to presentation in congresses and publishing in a scientific journal. The evidence obtained in this study will allow us to measure the quality of the evidence and greater transparency in decisions regarding the use of acupuncture as a viable alternative to managing chronic pain.

**Keywords:** Acupuncture. Chronic Pain. Methodological Survey.

### Strong Points and Limitations of this Study

- ✓ This is the first study to evaluate the outcome domains used in CRCT using acupuncture as intervention to the treatment of NOCP.

- ✓ Acupuncture can be an effective therapy in chronic pain control, avoiding costly expenses with analgesic medication which generate dependence (opioids), or limiting adverse effects as in the case of non-steroid anti-inflammatories (gastric ulcer and cardiovascular events) that have a direct impact in the patient's life. Therefore, checking compliance with IMMPACT recommendations in CRCT about NOCP may appraise the quality of the evidence and provide greater transparency in decisions regarding the use of acupuncture as a viable alternative in this clinical condition. It can also guide physicians in clinical practice decision making.
- ✓ The methods contain explicit eligibility criteria, a comprehensive research and a double independent selection, including independent appraisal of bias risk.
- ✓ Primary studies are probably limited in conception and outcome measures and thus, they have high bias risk. Besides, techniques or point categories used in acupuncture may be uncertain or varied in different studies.
- ✓ This enquiry has not received any specific sponsorship from any public, private or non-profit agency.

## INTRODUCTION

Non-Oncologic Chronic Pain (NOCP) is defined as a persisting painful feeling for more than some months, which may be associated to traumas and illnesses or not. [1] It is estimated that 18, 9% of the world population present chronic pain. It is one of the most common complaints among patients, affecting not only the subject in their individuality, but also in a general way. [2]

It is regarded as a health problem that consumes 22% of primary health appointments on average. In the United States, costs with pain medication are around US\$17, 8 billion a year. [3] In Canada the average cost is of \$ 1,462 per individual monthly with chronic pain on waiting lists [4] and of € 1,883.30 per individual, adult in Portugal. [5]

Acupuncture is one of the resources that compose the National Policy of Integrated and Supplementary Practices (NPISP) IN Brazil. It is a possible therapy in managing chronic pain with sensitive cost reduction to the government and adverse effect reduction to the patient. [6] The World Health Organization (WHO) has launched

1  
2  
3 a strategy for the period 2014-2023 to integrate to traditional medicine and supplement  
4 the health system in a safe, respectful, accessible and effective way. [7]  
5

6 The search for international guidelines approaching the use of acupuncture for  
7 NOCP in the adult population results in few findings or in conflicting recommendations.  
8 Acupuncture is recommended as an adjunct to conventional treatment of NOCP, but  
9 only the American guidelines specify the moment in which it should be used within the  
10 conventional drug treatment flow. [8] [9] [10] [2]  
11

12 Among the policies we looked up, the recommendation of acupuncture for many  
13 painful conditions is based on low quality evidence due to the diversity in the  
14 methodology of CRCT. [2 8-10] Besides this, such guidelines do not discriminate the  
15 power of the recommendation, except for those in Scotland and Canada. [2 8]  
16

17 Even showing quality, CRCT with adequate randomization and blinding may not  
18 provide the best approach for the development of strong evidence base for managing  
19 pain, in case the outcomes and its tools are not adequate. [11] Such limitations have  
20 been recognized internationally, leading to the development of the Initiative on  
21 Methods, Measurements and Pain Assessment in Clinical Trials (IMMPACT) in 2002.  
22

23 The initiative gathered 27 experts from universities, governmental agencies and  
24 pharmaceutical industry, who identified consensually a nucleus of six outcome domains  
25 that should be considered in CRCT for chronic pain. [12] The outcome domains  
26 considered were: (1) pain; (2) physical function; (3) emotional state; (4) evaluation of  
27 the participants regarding improvement and satisfaction with treatment; (5) adverse  
28 symptoms; and (6) the participant's willingness, but the first four domains listed as  
29 main. [13]  
30

31 The establishment of a standard set of outcome domains in CRCT about chronic  
32 pain encourages researchers to consider chronic pain as a complex phenomenon which  
33 affects patients in multiple dimensions. It protects against the polarization of selective  
34 outcomes, a common problem in all medical literature. It makes systematic reviews and  
35 Meta analyses easier, which allows researchers to generate more precise estimations of  
36 treatment effects due to sharing common outcomes of individual trials. [14]  
37

38 Variability in outcome measures in CRCT about NOCP generates inaccuracies  
39 in the effectiveness of certain treatments. Although the recommendation of IMMPACT  
40 was published in 2003 and updated in 2008, there is no information on whether  
41 subsequent clinical trials published comply with IMMPACT recommendations on their  
42 outcome measures.  
43  
44  
45  
46  
47  
48  
49  
50  
51  
52  
53  
54  
55  
56  
57  
58  
59  
60

1  
2  
3 The general aim of this project is to verify whether methodological quality of outcome  
4 reporting in published trials have used IMMPACT recommendations in measuring  
5 CRCT-NOCP outcomes which were executed as of September 2004 when acupuncture  
6 was used as a treatment.  
7  
8  
9

## 10 11 **METHODS**

### 12 13 14 **Study Design**

15 The study comprises a methodological survey of randomized clinical trials which used  
16 acupuncture for the treatment of chronic pain. The methodological survey is a type of  
17 study on method enquiry, with data collection form selected CRCT, not based on  
18 questionnaires but using systematic methods in its execution.  
19  
20  
21  
22  
23

### 24 25 26 **Research question**

27  
28 The question that guides this study was formulated using the PICO strategy,  
29 which represents an acronym for Patient, Intervention, Comparison and Outcomes. In  
30 evidence-based practice, these four components are the fundamental elements of the  
31 research question and the construction of the question for the bibliographic search for  
32 evidence. Adequate research question allows the correct definition of what information  
33 (evidence) is necessary to solve the clinical research question, maximizes the retrieval  
34 of evidence in the databases, focuses the scope of the research and avoids unnecessary  
35 searches. [15]  
36  
37  
38  
39  
40  
41

42 Using the PICO strategy, the question of this survey was: RCT with individuals  
43 with Non-Oncologic Chronic Pain (*population*) treated with acupuncture (*intervention*),  
44 and where the comparator used was acupuncture sham or not acupuncture (*comparison*),  
45 they reported the domains of IMMPACT recommendations (*outcome*).  
46  
47  
48  
49  
50  
51

### 52 53 54 **Reference Sources and Search**

55 All trials already included in CRCT-NOCP, published as of September 2004,  
56 selected in the systematic review carried out by Vickers et al. [16] Additional research  
57  
58  
59  
60

1  
2  
3 will be performed in studies dating as from January 2011 and 6 months before the  
4 systematic review of the comprehensive search date on the theme (considering delay in  
5 indexing) to nowadays. The search for eligible studies will be accomplished by  
6 systematic research of database, namely Lilacs, CINAHL, EMBASE, MEDLINE,  
7 AMED, Web of Science, Clinical Trials and Cochrane Central Registry of Controlled  
8 Trials, with a defined search strategy, free of idiom restriction.  
9  
10  
11  
12

13  
14 We shall combine the main terms “Chronic Pain” and “Acupuncture” indexed in  
15 the MeSH system. Firstly, we will search the isolate terms and their synonyms, and then  
16 we will make a second search, combining and crossing the terms. Appendix A, Table 1.  
17  
18  
19

20  
21 We will verify the reference or citation list found in secondary studies to identify  
22 possibly eligible studies. When necessary, we shall contact the authors of the main  
23 studies to obtain further information.  
24  
25  
26

### 27 **Study Eligibility Criteria**

28  
29  
30 The eligibility criteria for this study will be the same as those adopted in the  
31 systematic review published in 2012.  
32

33  
34 Design: controlled randomized clinical trials, whose patient recruitment occurred  
35 from September 2004 and whose number of patients is equal or more than 100.  
36

37  
38 Clinical condition: studies which include patients aged 18 or older, with non-  
39 oncologic chronic pain. Eligible pain conditions: Osteoarthritis, chronic or recurrent  
40 headaches, specific and nonspecific shoulder pains, and nonspecific back or neck pain.  
41 For osteoarthritis or headaches, it will not be necessary the duration of the pain, since  
42 both are of a chronic nature. For pain in the shoulder, back and neck, the pain episode  
43 should be at least four weeks in duration.  
44  
45  
46

47  
48 Intervention: the studies should include a group of patients treated with  
49 acupuncture, where acupuncture points or trigger points were stimulated with  
50 acupuncture needles, and another group where patients were treated with sham  
51 acupuncture or no acupuncture, and studies where the choice blinding is unmistakable  
52 and adequate.  
53  
54  
55  
56  
57  
58  
59  
60

1  
2  
3 *Exclusion Criteria:* The following trials are to be excluded: neck or back pains  
4 associated with specific clinical conditions (e.g., fractures resulting from osteoporosis).  
5  
6

### 7 **Determination of Eligibility**

8  
9 Two reviewers, in pairs, will evaluate independently whether summaries and  
10 titles are according to the eligibility criteria. Differences are to be solved by consensus  
11 among all reviewers. To assess the agreement of the selection we will use Kappa Test,  
12 given that kappa values between 0,40 and 0,59 are to be considered weak agreement,  
13 between 0,60 and 0,74 medium agreement, and 0,75 or more excellent agreement.  
14  
15  
16  
17

18  
19 In order to exclude doubled articles, one reviewer will analyze all the eligible  
20 articles and identify those which have one or more authors in common. In case of  
21 doubled publication, we will use the article with most complete data.  
22  
23  
24

### 25 **Data Extraction**

26  
27 We will adopt an Excel spreadsheet for the abstraction of data, to be used by two  
28 reviewers separately. A third reviewer will check the Excel spreadsheet to ensure the  
29 coherence of the answers obtained among collaborators and use the consensus when  
30 necessary.  
31  
32  
33

34 For articles published only in summary or for those with important information  
35 missing, we will look for complete information about methods and results by contacting  
36 the authors.  
37  
38

39 Two reviewers will be calibrated by the extraction of at least three articles and  
40 next, will perform the consensus, in pairs and independently. This procedure shall occur  
41 until reviewers are able to extract the data. The collected data will be: name of the first  
42 author, date of publication, country of origin, impact of the journal, recruitment date of  
43 the first participant, presence of outcome domains IMMPACT, and the tools used for  
44 measuring the outcome domains, method of acupuncture, clinical condition of the  
45 patient, duration of treatment. Besides this, the study will check if fundamental  
46 outcomes are reported by the patient (ORP), if clinical outcomes are reported (COR), if  
47 the outcome was reported by a third person (ORT), or a combination of the items above.  
48  
49  
50  
51  
52  
53  
54  
55  
56  
57  
58  
59  
60



1  
2  
3 The data will be recorded to be transferred to a statistical analysis program later.  
4 A regression analysis will be conducted to explore factors that may be associated with  
5 the presence of outcome domains according to IMMPACT recommendations.  
6  
7

### 8 9 **Risk of Bias**

10 A modified version of Cochrane for risk of bias will be used. [14 17] Reviewers  
11 will evaluate the risk of bias for each randomized trial independently, according to the  
12 following criteria: generation of random sequence, hiding of the choices, blinding of  
13 participants and professionals, blinding of outcome evaluators, if outcomes were  
14 reported adequately; incomplete outcomes; selective outcome reporting and other  
15 sources of bias. Reviewers will attribute answer alternatives “definitely yes”, “probably  
16 yes”, “probably not” and “definitely not” for each of the domains. [18] Ultimately,  
17 “definitely yes” and “probably yes” will be attributed low risk of bias, whereas  
18 “definitely not” and “probably not” mean high risk of bias. Reviewers will solve  
19 divergences through discussion, and a third person will judge unsolved divergences.  
20  
21  
22  
23  
24  
25  
26  
27  
28

### 29 **Definitions of IMMPACT outcome domain**

30 The four IMMPACT domains recommended in 2003 and 2008 which will be  
31 captured in this study are listed below, together with their definitions  
32  
33

34 1. Pain: Includes various aspects of pain evaluation (e.g., intensity of pain,  
35 duration and frequency). The global evaluation of pain is a general assessment which  
36 examines how the pain changed during the treatment.  
37  
38

39 2. Physical function: refers to the participant’s capacity to conduct their daily  
40 activities (e.g., tasks, walks, trips and self-care), strength and resistance.  
41

42 3. Emotional state: refers to the treatment associated to emotional anguish (e.g.,  
43 depression, anxiety, anger or irritability).  
44

45 4. Patient’s classification of improvement and satisfaction with the treatment:  
46 refers to the participant’s feeling with the treatment (that is, if they feel the positive  
47 features of the treatment surpass the negative ones). This domain overcomes pain  
48 classification only.  
49  
50

51  
52 Thereafter, for each domain, the measurement method is quantized, that is,  
53 whether the pain was measured by VAS and / or VAN, whether physical function was  
54 measured by multidimensional inventory to pain and / or inventory summary of the  
55 pain, whether the emotional state was measured by the Beck depression inventory and /  
56  
57  
58  
59  
60

1  
2  
3 or mood state profile, and whether the improvement in patient satisfaction was  
4 measured by the patient's overall impression of change. The correct applicability of the  
5 instrument will also be quantified (if the domain report was executed by the patient,  
6 clinical or third parties).  
7  
8  
9

### 10 11 **Statistical Analysis**

12  
13  
14 The statistical analyzes carried out in this survey will aim to identify the factors  
15 associated with the change in reporting or adherence to the IMMPACT  
16 recommendations, in RCT made since its publication.  
17

18  
19 The descriptive part includes year of publication, place of study, factor of impact  
20 of the journal and items of evaluation of methodological quality. These factors will be  
21 highlighted as they may influence the adherence of the IMMPACT recommendations.  
22 Afterwards, the frequency of measurement of pain, physical function, emotional state  
23 and patient satisfaction improvement will be described according to the IMMPACT  
24 recommendations.  
25  
26  
27  
28

29 Compliance with IMMPACT will be measured by the attendance of the four  
30 main domains. It is also planned to quantify the number of IMMPACT domains that  
31 will be served, in order to generate a score between 0-4 points. The score will be  
32 described on average, standard deviation, median and interquartile range.  
33  
34  
35

36 A score of 0 will be given when the study does not report any of the domains  
37 recommended by IMMPACT, score 1, when reporting only one of the recommended  
38 domains; Score 2 when reporting two of the recommended domains; Score 3, when  
39 reporting three of the recommended domains; and score 4 when reporting the four major  
40 domains recommended by IMMPACT.  
41  
42  
43

44 The factors associated with compliance with the areas of IMMPACT will be  
45 investigated. For this, a logistic regression will be performed considering the domains  
46 of IMMPACT as dependent variables and the characteristics of the study as independent  
47 variables (year of publication, place of study, periodic impact factor and items of  
48 methodological quality evaluation). For a good regression analysis, a minimum of 10  
49 references is necessary, which will not be a problem since we will include previous SR  
50 studies. The results will be expressed in Odds Ratio with respective 95% confidence  
51 intervals.  
52  
53  
54  
55  
56  
57  
58  
59  
60

1  
2  
3 Factors associated with the IMMPACT score will also be investigated.  
4 Depending on the data distribution, one-tailed analysis of variance (ANOVA) or one-  
5 tailed Kruskal Wallis will be performed. A significant statistical difference will be  
6 attributed to cases of  $p \leq 0.05$ .  
7  
8

9 All calculations will run in STATA 14.2.  
10

## 11 12 **DISCUSSION**

13  
14  
15 Our survey will evaluate methodologically the outcomes of RCT which used  
16 acupuncture for NOCP. We will check whether methodological quality of outcome  
17 reporting in published trials have used IMMPACT recommendations in measuring  
18 CRCT-NOCP outcomes when acupuncture was used as a treatment. Our survey's  
19 outcomes will be significant for public health and for health professionals all over the  
20 world, mainly in Brazil.  
21  
22

23  
24 Since the publication of IMMPACT, it is not known whether studies using  
25 acupuncture as an intervention for chronic pain follow IMMPACT's recommendations.  
26 Without consistent and more thorough standard outcome reports for patients in CRCT  
27 and NOCP, the authors of such studies will be unable to judge objectively the effects of  
28 acupuncture. The data compiled on the use of acupuncture will inform both patients and  
29 health professionals about its efficacy and safety. Therefore, multiprofessional care and  
30 decision-making based on evidence will be made easier.  
31  
32

33  
34 This Project aims at exploring some hypotheses to determine the use of  
35 IMMPACT recommendations on CRCT-NOCP. After the publication of IMMPACT  
36 orientations in August 2003 and later, in 2008, CRCT-NOCP which started recruiting  
37 participants as from September 2004 had better reports of main outcomes, regarding  
38 IMMPACT domains versus journals with lower impact factors. The main domains were  
39 reported by the patient, by the clinician, by a third person or by a combination of these  
40 subjects.  
41  
42

## 43 44 **ETHICS AND DIFUSION**

45  
46 Ethics is not necessary, as this is protocol for a methodological survey. The  
47 survey will be published in a journal and presented in congresses with reviews by peers.  
48 The evidence of this study will allow health professionals to verify the efficacy and  
49  
50  
51  
52  
53  
54  
55  
56  
57  
58  
59  
60

1  
2  
3 safety of acupuncture for the treatment of NOCP. Updates of this study should be  
4 conducted to inform and orient the practice of health care.  
5

6 **Contributors:** LCL is the main researcher who led the writing of the  
7 manuscript. CCB and LGM are the project manager, co-researcher, who contributed to  
8 and writing and review of the manuscript. MTS is co-researcher, and contributed to the  
9 writing and review of the manuscript. All the authors have read and approved of the  
10 final manuscript.  
11

12 **Acknowledgments:** The authors thank Dr. Caio Guimarães for his expert  
13 advice.  
14

15 **Sponsorship:** This Project has not received any specific funding of any public,  
16 private or non-profit agency.  
17

18 **Interest conflict:** None.  
19  
20  
21  
22  
23  
24  
25  
26  
27  
28  
29  
30  
31  
32  
33  
34  
35  
36  
37  
38  
39  
40  
41  
42  
43  
44  
45  
46  
47  
48  
49  
50  
51  
52  
53  
54  
55  
56  
57  
58  
59  
60

## REFERENCES

1. Ontario RNAo. Assessment and management of pain. 3<sup>a</sup> ed. Dez/2013 ed. Rockville MD: Agency for Healthcare Research and Quality (AHRQ), 2013.
2. SIGN SIGN. Management of chronic pain. A national clinical guideline. Secondary Management of chronic pain. A national clinical guideline 2013. <http://www.guideline.gov/content.aspx?id=47707&search=chronic+pain>.
3. Rasu RS, Vouthy K, Crowl AN, et al. Cost of pain medication to treat adult patients with nonmalignant chronic pain in the United States. *Journal of managed care & specialty pharmacy* 2014;**20**(9):921-8 doi: 10.18553/jmcp.2014.20.9.921[published Online First: Epub Date]].
4. Guerriere DN, Choiniere M, Dion D, et al. The Canadian STOP-PAIN project - Part 2: What is the cost of pain for patients on waitlists of multidisciplinary pain treatment facilities? *Canadian journal of anaesthesia = Journal canadien d'anesthesie* 2010;**57**(6):549-58 doi: 10.1007/s12630-010-9306-4[published Online First: Epub Date]].
5. Azevedo LF, Costa-Pereira A, Mendonca L, Dias CC, Castro-Lopes JM. The economic impact of chronic pain: a nationwide population-based cost-of-illness study in Portugal. *The European journal of health economics : HEPAC : health economics in prevention and care* 2016;**17**(1):87-98 doi: 10.1007/s10198-014-0659-4[published Online First: Epub Date]].
6. Brasil. Política Nacional de Práticas Integrativas e Complementares no SUS. Ministério da Saúde 2006;**DOU – seção 1**
7. Salud OMDI. Estrategia de la OMS sobre medicina tradicional 2014-2023. 2013
8. Ontario CoPaSo. Evidence-based recommendations for medical management of chronic non-malignant pain. . CPSO 2000
9. Practice guidelines for chronic pain management: an updated report by the American Society of Anesthesiologists Task Force on Chronic Pain Management and the American Society of Regional Anesthesia and Pain Medicine. *Anesthesiology* 2010;**112**(4):810-33
10. National Guideline C. Assessment and management of chronic pain. Secondary Assessment and management of chronic pain 2011. <http://www.guideline.gov/content.aspx?id=47646&search=assessment+and+mangement+of+chronic+pain>.
11. Dworkin RH, Turk DC, Peirce-Sandner S, et al. Research design considerations for confirmatory chronic pain clinical trials: IMMPACT recommendations. *Pain* 2010;**149**(2):177-93 doi: 10.1016/j.pain.2010.02.018[published Online First: Epub Date]].
12. Turk DC, Dworkin RH, Allen RR, et al. Core outcome domains for chronic pain clinical trials: IMMPACT recommendations. *Pain* 2003;**106**(3):337-45
13. Dworkin RH, Turk DC, Farrar JT, et al. Core outcome measures for chronic pain clinical trials: IMMPACT recommendations. *Pain* 2005;**113**(1-2):9-19 doi: 10.1016/j.pain.2004.09.012[published Online First: Epub Date]].
14. Higgins JP GS. *Cochrane handbook for systematic reviews of interventions*, version [5.1.0](updated March 2011). The Cochrane Collaboration 2011
15. Santos CMdC, Pimenta CAdM, Nobre MRC. The PICO strategy for the research question construction and evidence search. *Revista Latino-Americana de Enfermagem* 2007;**15**:508-11

- 1
- 2
- 3
- 4 16. Vickers AJ, Cronin AM, Maschino AC, et al. Acupuncture for chronic pain:  
5 individual patient data meta-analysis. Archives of internal medicine  
6 2012;**172**(19):1444-53 doi: 10.1001/archinternmed.2012.3654[published  
7 Online First: Epub Date]].
- 8 17. Akl EA, Sun X, Busse JW, et al. Specific instructions for estimating unclearly  
9 reported blinding status in randomized trials were reliable and valid. Journal of  
10 clinical epidemiology 2012;**65**(3):262-7 doi:  
11 10.1016/j.jclinepi.2011.04.015[published Online First: Epub Date]].
- 12 18. Busse J, Guyatt G. Modification of Cochrane Tool to assess risk of bias in  
13 randomized trials. , 2013.
- 14
- 15
- 16
- 17
- 18
- 19
- 20
- 21
- 22
- 23
- 24
- 25
- 26
- 27
- 28
- 29
- 30
- 31
- 32
- 33
- 34
- 35
- 36
- 37
- 38
- 39
- 40
- 41
- 42
- 43
- 44
- 45
- 46
- 47
- 48
- 49
- 50
- 51
- 52
- 53
- 54
- 55
- 56
- 57
- 58
- 59
- 60

## Appendix A

Table 1. Search Strategy for database

Database: Ovid MEDLINE(R) In-Process & Other Non-Indexed Citations, Ovid MEDLINE(R) Daily and Ovid MEDLINE(R) <1946 to Present>

Search Strategy:

1 exp Acupuncture Analgesia/  
 2 exp Acupuncture/  
 3 acupuncture.mp.  
 4 1 OR 2 OR 3  
 5 chronic pain.mp.  
 6 exp Chronic Pain/  
 7 exp Chronic Disease/  
 8 5 OR 6 OR 7  
 9 4 AND 8

Database: Embase <1974 to 2016 June 28>

Search Strategy:

1 exp acupuncture analgesia/  
 2 acupuncture.mp.  
 3 exp acupuncture/  
 4 1 OR 2 OR 3  
 5 exp chronic pain/  
 6 chronic pain.mp.  
 7 5 OR 6  
 8 4 AND 7

Database: AMED (Allied and Complementary Medicine) <1985 to June 2016>

Search Strategy:

1 acupuncture.mp.  
 2 exp Acupuncture/  
 3 1 OR 2  
 4 exp Chronic disease/  
 5 chronic pain.mp.  
 6 4 OR 5  
 7 3 AND 6

Database: CINAHL

Search Strategy:

1 (MH "Acupuncture+")  
 2 (MH "Acupuncture Analgesia")  
 3 1 OR 2  
 4 (MH "Chronic Pain")  
 5 3 AND 4

Database: Cochrane Library

Search Strategy:

1 "acupuncture":ti,ab,kw  
 2 "acupuncture analgesia":ti,ab,kw

1  
2  
3 1 OR 2  
4 "chronic pain":ti,ab,kw  
5 3 AND 4  
6  
7

8 Database: Web of Science <1976 to July 2016>

9 Search Strategy:

10 1 acupuncture  
11 2 \*acupuncture\*  
12 3 1 OR 2  
13 4 chronic pain  
14 5 chronic \*pain\*  
15 6 4 OR 5  
16 7 3 AND 6  
17  
18  
19  
20  
21  
22  
23  
24  
25  
26  
27  
28  
29  
30  
31  
32  
33  
34  
35  
36  
37  
38  
39  
40  
41  
42  
43  
44  
45  
46  
47  
48  
49  
50  
51  
52  
53  
54  
55  
56  
57  
58  
59  
60



## PRISMA-P 2015 Checklist

This checklist has been adapted for use with protocol submissions to *Systematic Reviews* from Table 3 in Moher D et al: Preferred reporting items for systematic review and meta-analysis protocols (PRISMA-P) 2015 statement. *Systematic Reviews* 2015 4:1

| Section/topic                     | #  | Checklist item                                                                                                                                                                                  | Information reported     |                          | Page number(s) |
|-----------------------------------|----|-------------------------------------------------------------------------------------------------------------------------------------------------------------------------------------------------|--------------------------|--------------------------|----------------|
|                                   |    |                                                                                                                                                                                                 | Yes                      | No                       |                |
| <b>ADMINISTRATIVE INFORMATION</b> |    |                                                                                                                                                                                                 |                          |                          |                |
| <b>Title</b>                      |    |                                                                                                                                                                                                 |                          |                          |                |
| Identification                    | 1a | Identify the report as a protocol of a systematic review                                                                                                                                        | <input type="checkbox"/> |                          | 1              |
| Update                            | 1b | If the protocol is for an update of a previous systematic review, identify as such                                                                                                              |                          |                          | not applicable |
| <b>Registration</b>               | 2  | If registered, provide the name of the registry (e.g., PROSPERO) and registration number in the Abstract                                                                                        |                          |                          | not applicable |
| <b>Authors</b>                    |    |                                                                                                                                                                                                 |                          |                          |                |
| Contact                           | 3a | Provide name, institutional affiliation, and e-mail address of all protocol authors; provide physical mailing address of corresponding author                                                   | <input type="checkbox"/> |                          | 1              |
| Contributions                     | 3b | Describe contributions of protocol authors and identify the guarantor of the review                                                                                                             | <input type="checkbox"/> |                          | 10             |
| <b>Amendments</b>                 | 4  | If the protocol represents an amendment of a previously completed or published protocol, identify as such and list changes; otherwise, state plan for documenting important protocol amendments |                          | <input type="checkbox"/> | not applicable |
| <b>Support</b>                    |    |                                                                                                                                                                                                 |                          |                          |                |
| Sources                           | 5a | Indicate sources of financial or other support for the review                                                                                                                                   | <input type="checkbox"/> |                          | 10             |
| Sponsor                           | 5b | Provide name for the review funder and/or sponsor                                                                                                                                               |                          | <input type="checkbox"/> | not applicable |
| Role of sponsor/funder            | 5c | Describe roles of funder(s), sponsor(s), and/or institution(s), if any, in developing the protocol                                                                                              |                          | <input type="checkbox"/> | not applicable |
| <b>INTRODUCTION</b>               |    |                                                                                                                                                                                                 |                          |                          |                |
| <b>Rationale</b>                  | 6  | Describe the rationale for the review in the context of what is already known                                                                                                                   | <input type="checkbox"/> |                          | 5              |
| <b>Objectives</b>                 | 7  | Provide an explicit statement of the question(s) the review will address with reference to participants, interventions, comparators, and outcomes (PICO)                                        | <input type="checkbox"/> |                          | 5              |

| Section/topic                             | #   | Checklist item                                                                                                                                                                                                                              | Information reported     |    | Page number(s) |
|-------------------------------------------|-----|---------------------------------------------------------------------------------------------------------------------------------------------------------------------------------------------------------------------------------------------|--------------------------|----|----------------|
|                                           |     |                                                                                                                                                                                                                                             | Yes                      | No |                |
| <b>METHODS</b>                            |     |                                                                                                                                                                                                                                             |                          |    |                |
| <b>Eligibility criteria</b>               | 8   | Specify the study characteristics (e.g., PICO, study design, setting, time frame) and report characteristics (e.g., years considered, language, publication status) to be used as criteria for eligibility for the review                   | <input type="checkbox"/> |    | 5, 6           |
| <b>Information sources</b>                | 9   | Describe all intended information sources (e.g., electronic databases, contact with study authors, trial registers, or other grey literature sources) with planned dates of coverage                                                        | <input type="checkbox"/> |    | 5, 6           |
| <b>Search strategy</b>                    | 10  | Present draft of search strategy to be used for at least one electronic database, including planned limits, such that it could be repeated                                                                                                  | <input type="checkbox"/> |    | 5, 6           |
| <b>STUDY RECORDS</b>                      |     |                                                                                                                                                                                                                                             |                          |    |                |
| Data management                           | 11a | Describe the mechanism(s) that will be used to manage records and data throughout the review                                                                                                                                                | <input type="checkbox"/> |    | 7              |
| Selection process                         | 11b | State the process that will be used for selecting studies (e.g., two independent reviewers) through each phase of the review (i.e., screening, eligibility, and inclusion in meta-analysis)                                                 | <input type="checkbox"/> |    | 7              |
| Data collection process                   | 11c | Describe planned method of extracting data from reports (e.g., piloting forms, done independently, in duplicate), any processes for obtaining and confirming data from investigators                                                        | <input type="checkbox"/> |    | 7              |
| <b>Data items</b>                         | 12  | List and define all variables for which data will be sought (e.g., PICO items, funding sources), any pre-planned data assumptions and simplifications                                                                                       | <input type="checkbox"/> |    | 7              |
| <b>Outcomes and prioritization</b>        | 13  | List and define all outcomes for which data will be sought, including prioritization of main and additional outcomes, with rationale                                                                                                        | <input type="checkbox"/> |    | 7,8            |
| <b>Risk of bias in individual studies</b> | 14  | Describe anticipated methods for assessing risk of bias of individual studies, including whether this will be done at the outcome or study level, or both; state how this information will be used in data synthesis                        | <input type="checkbox"/> |    | 7              |
| <b>DATA</b>                               |     |                                                                                                                                                                                                                                             |                          |    |                |
| <b>Synthesis</b>                          | 15a | Describe criteria under which study data will be quantitatively synthesized                                                                                                                                                                 | <input type="checkbox"/> |    | 8, 9           |
|                                           | 15b | If data are appropriate for quantitative synthesis, describe planned summary measures, methods of handling data, and methods of combining data from studies, including any planned exploration of consistency (e.g., $I^2$ , Kendall's tau) | <input type="checkbox"/> |    | 8, 9           |
|                                           | 15c | Describe any proposed additional analyses (e.g., sensitivity or subgroup analyses, meta-regression)                                                                                                                                         | <input type="checkbox"/> |    | 9              |
|                                           | 15d | If quantitative synthesis is not appropriate, describe the type of summary planned                                                                                                                                                          | <input type="checkbox"/> |    | 9              |

| Section/topic                     | #  | Checklist item                                                                                                              | Information reported     |                          | Page number(s) |
|-----------------------------------|----|-----------------------------------------------------------------------------------------------------------------------------|--------------------------|--------------------------|----------------|
|                                   |    |                                                                                                                             | Yes                      | No                       |                |
| Meta-bias(es)                     | 16 | Specify any planned assessment of meta-bias(es) (e.g., publication bias across studies, selective reporting within studies) | <input type="checkbox"/> |                          | 7, 8           |
| Confidence in cumulative evidence | 17 | Describe how the strength of the body of evidence will be assessed (e.g., GRADE)                                            |                          | <input type="checkbox"/> | not applicable |

For peer review only

# BMJ Open

## USE OF IMPACT DOMAINS IN CLINICAL TRIALS OF ACUPUNCTURE FOR CHRONIC PAIN: A PROTOCOL FOR A METHODOLOGICAL SURVEY

|                                 |                                                                                                                                                                                                                                                                                             |
|---------------------------------|---------------------------------------------------------------------------------------------------------------------------------------------------------------------------------------------------------------------------------------------------------------------------------------------|
| Journal:                        | <i>BMJ Open</i>                                                                                                                                                                                                                                                                             |
| Manuscript ID                   | bmjopen-2016-014904.R4                                                                                                                                                                                                                                                                      |
| Article Type:                   | Protocol                                                                                                                                                                                                                                                                                    |
| Date Submitted by the Author:   | 15-Aug-2017                                                                                                                                                                                                                                                                                 |
| Complete List of Authors:       | Mazzei, Lauren; Universidade de Sorocaba, Programa de Pós-Graduação em Ciências Farmacêuticas<br>Bergamaschi, Cristiane; University of Sorocaba, Pharmaceutical Science<br>Silva, Marcus; Federal University of Amazonas, Clinical Epidemiology<br>Lopes, Luciane; UNISO, Pharmacie Science |
| <b>Primary Subject Heading</b>: | Research methods                                                                                                                                                                                                                                                                            |
| Secondary Subject Heading:      | Complementary medicine, Evidence based practice                                                                                                                                                                                                                                             |
| Keywords:                       | Acupuncture, Chronic Pain, Methodological Survey                                                                                                                                                                                                                                            |
|                                 |                                                                                                                                                                                                                                                                                             |

SCHOLARONE™  
Manuscripts

1  
2  
3 **USE OF IMPACT DOMAINS IN CLINICAL TRIALS OF ACUPUNCTURE**  
4 **FOR CHRONIC PAIN: A PROTOCOL FOR A METHODOLOGICAL SURVEY**  
5  
6

7 **Authors:** Lauren Giusti Mazzei<sup>1</sup>, Cristiane de Cássia Bergamaschi<sup>1</sup>, Marcus Tolentino  
8 Silva<sup>1</sup>, Luciane Cruz Lopes<sup>1</sup>  
9

10  
11 **Author affiliations**

12 <sup>1</sup> Pharmaceutical Sciences Graduate Program, University of Sorocaba, Sorocaba, State  
13 of São Paulo, Brazil  
14

15 Email address:

16 Lauren Giusti Mazzei [laurengmazzei@hotmail.com](mailto:laurengmazzei@hotmail.com)

17 Cristiane de Cássia Bergamaschi [cristiane.motta@prof.uniso.br](mailto:cristiane.motta@prof.uniso.br)

18 Marcus Tolentino Silva [marcusts@gmail.com](mailto:marcusts@gmail.com)

19 Luciane Cruz Lopes [luslopes@terra.com.br](mailto:luslopes@terra.com.br)  
20  
21

22 Corresponding author:

23 Luciane Cruz Lopes

24 Universidade de Sorocaba - UNISO

25 Rodovia Raposo Tavares, km 92.5, 18023-000

26 Sorocaba – SP, Brasil

27 Phone/Fax (15) 2101-7104  
28  
29

30 2562 words  
31  
32  
33  
34  
35  
36  
37  
38  
39  
40  
41  
42  
43  
44  
45  
46  
47  
48  
49  
50  
51  
52  
53  
54  
55  
56  
57  
58  
59  
60

## SUMMARY

**INTRODUCTION:** Pain is one of the most common and most debilitating complaints among patients. They affect the individual, their relationship with friends and family, their work force, and their sociability. Acupuncture is one of the therapeutic resources for managing chronic pain. Given the variability of outcome measures in Controlled Randomized Clinical Trials on Non-Oncologic Chronic Pain (CRCT-NOCP), the Initiative in Methods, Measurements and Pain Assessment in Clinical Trials (IMMPACT) recommends six domains to be covered in evaluating the effectiveness of treatments for chronic pain.

**OBJECTIVE:** The main objective of this study is to check whether methodological quality of outcome reporting in published trials have used IMMPACT recommendations in measuring CRCT-NOCP outcomes when acupuncture was used as a treatment.

**METHOD:** This is a methodological study. We will systematically search for eligible studies in specific database with a defined strategy. We are to use terms of MeSH “acupuncture”, “chronic pain” and its similar terms, without idiom restrictions. Eligible studies include those which randomized and chose NOCP patients to be treated with acupuncture or control (sham acupuncture or no acupuncture), recruited after September 2004, number of patients equal or more than 100. The measured outcomes are to be the presence of outcome domains recommended by IMMPACT, domains reported by patient or clinician, tools used to measure such domains, besides other features of the studies. We shall conduct a regression analysis to explore factors which can be associated with the presence of outcome domains according to IMMPACT recommendations.

**ETHICS AND DISSEMINATION:** This survey will be submitted to presentation in congresses and publishing in a scientific journal. The evidence obtained in this study will allow us to measure the quality of the evidence and greater transparency in decisions regarding the use of acupuncture as a viable alternative to managing chronic pain.

**Keywords:** Acupuncture. Chronic Pain. Methodological Survey.

### Strong Points and Limitations of this Study

- ✓ This is the first study to evaluate the outcome domains used in CRCT using acupuncture as intervention to the treatment of NOCP.

- 1  
2  
3 ✓ Acupuncture can be an effective therapy in chronic pain control, avoiding costly  
4 expenses with analgesic medication which generate dependence (opioids), or  
5 limiting adverse effects as in the case of non-steroid anti-inflammatories (gastric  
6 ulcer and cardiovascular events) that have a direct impact in the patient's life.  
7 Therefore, checking compliance with IMMPACT recommendations in CRCT  
8 about NOCP may appraise the quality of the evidence and provide greater  
9 transparency in decisions regarding the use of acupuncture as a viable alternative  
10 in this clinical condition. It can also guide physicians in clinical practice  
11 decision making.  
12  
13 ✓ The methods contain explicit eligibility criteria, a comprehensive research and a  
14 double independent selection, including independent appraisal of bias risk.  
15  
16 ✓ Primary studies are probably limited in conception and outcome measures and  
17 thus, they have high bias risk. Besides, techniques or point categories used in  
18 acupuncture may be uncertain or varied in different studies.  
19  
20 ✓ This enquiry has not received any specific sponsorship from any public, private  
21 or non-profit agency.  
22  
23  
24  
25  
26  
27  
28  
29  
30  
31  
32

## 33 INTRODUCTION

34  
35 Non-Oncologic Chronic Pain (NOCP) is defined as a persisting painful feeling  
36 for more than some months, which may be associated to traumas and illnesses or not.  
37 [1] It is estimated that 18, 9% of the world population present chronic pain. It is one of  
38 the most common complaints among patients, affecting not only the subject in their  
39 individuality, but also in a general way. [2]

40  
41 It is regarded as a health problem that consumes 22% of primary health  
42 appointments on average. In the United States, costs with pain medication are around  
43 US\$17, 8 billion a year. [3] In Canada the average cost is of \$ 1,462 per individual  
44 monthly with chronic pain on waiting lists [4] and of € 1,883.30 per individual, adult in  
45 Portugal. [5]

46  
47 Acupuncture is one of the resources that compose the National Policy of  
48 Integrated and Supplementary Practices (NPISP) IN Brazil. It is a possible therapy in  
49 managing chronic pain with sensitive cost reduction to the government and adverse  
50 effect reduction to the patient. [6] The World Health Organization (WHO) has launched  
51  
52  
53  
54  
55  
56  
57  
58  
59  
60

1  
2  
3 a strategy for the period 2014-2023 to integrate to traditional medicine and supplement  
4 the health system in a safe, respectful, accessible and effective way. [7]  
5

6 The search for international guidelines approaching the use of acupuncture for  
7 NOCP in the adult population results in few findings or in conflicting recommendations.  
8 Acupuncture is recommended as an adjunct to conventional treatment of NOCP, but  
9 only the American guidelines specify the moment in which it should be used within the  
10 conventional drug treatment flow. [8] [9] [10] [2]  
11

12 Among the policies we looked up, the recommendation of acupuncture for many  
13 painful conditions is based on low quality evidence due to the diversity in the  
14 methodology of CRCT. [2 8-10] Besides this, such guidelines do not discriminate the  
15 power of the recommendation, except for those in Scotland and Canada. [2 8]  
16

17 Even showing quality, CRCT with adequate randomization and blinding may not  
18 provide the best approach for the development of strong evidence base for managing  
19 pain, in case the outcomes and its tools are not adequate. [11] Such limitations have  
20 been recognized internationally, leading to the development of the Initiative on  
21 Methods, Measurements and Pain Assessment in Clinical Trials (IMMPACT) in 2002.  
22

23 The initiative gathered 27 experts from universities, governmental agencies and  
24 pharmaceutical industry, who identified consensually a nucleus of six outcome domains  
25 that should be considered in CRCT for chronic pain. [12] The outcome domains  
26 considered were: (1) pain; (2) physical function; (3) emotional state; (4) evaluation of  
27 the participants regarding improvement and satisfaction with treatment; (5) adverse  
28 symptoms; and (6) the participant's willingness, but the first four domains listed as  
29 main. [13]  
30

31 The establishment of a standard set of outcome domains in CRCT about chronic  
32 pain encourages researchers to consider chronic pain as a complex phenomenon which  
33 affects patients in multiple dimensions. It protects against the polarization of selective  
34 outcomes, a common problem in all medical literature. It makes systematic reviews and  
35 Meta analyses easier, which allows researchers to generate more precise estimations of  
36 treatment effects due to sharing common outcomes of individual trials. [14]  
37

38 Variability in outcome measures in CRCT about NOCP generates inaccuracies  
39 in the effectiveness of certain treatments. Although the recommendation of IMMPACT  
40 was published in 2003 and updated in 2008, there is no information on whether  
41 subsequent clinical trials published comply with IMMPACT recommendations on their  
42 outcome measures.  
43  
44  
45  
46  
47  
48  
49  
50  
51  
52  
53  
54  
55  
56  
57  
58  
59  
60



1  
2  
3 The general aim of this project is to verify whether methodological quality of outcome  
4 reporting in published trials have used IMMPACT recommendations in measuring  
5 CRCT-NOCP outcomes which were executed as of September 2004 when acupuncture  
6 was used as a treatment.  
7  
8  
9

## 10 11 **METHODS**

### 12 13 14 **Study Design**

15 The study comprises a methodological survey of randomized clinical trials which used  
16 acupuncture for the treatment of chronic pain. The methodological survey is a type of  
17 study on method enquiry, with data collection from selected CRCT, not based on  
18 questionnaires but using systematic methods in its execution.  
19  
20  
21  
22  
23

### 24 25 26 **Research question**

27  
28  
29 The question that guides this study was formulated using the PICO strategy,  
30 which represents an acronym for Patient, Intervention, Comparison and Outcomes. In  
31 evidence-based practice, these four components are the fundamental elements of the  
32 research question and the construction of the question for the bibliographic search for  
33 evidence. Adequate research question allows the correct definition of what information  
34 (evidence) is necessary to solve the clinical research question, maximizes the retrieval  
35 of evidence in the databases, focuses the scope of the research and avoids unnecessary  
36 searches. [15]  
37  
38  
39

40  
41  
42 Using the PICO strategy, the question of this survey was: RCT with individuals  
43 with Non-Oncologic Chronic Pain (*population*) treated with acupuncture (*intervention*),  
44 and where the comparator used was acupuncture sham or not acupuncture (*comparison*),  
45 they reported the domains of IMMPACT recommendations (*outcome*).  
46  
47  
48  
49

### 50 51 52 **Reference Sources and Search**

53  
54  
55 All trials already included in CRCT-NOCP, published as of September 2004,  
56 selected in the systematic review carried out by Vickers et al. [16] Additional research  
57  
58  
59  
60

1  
2  
3 will be performed in studies dating as from January 2011 and 6 months before the  
4 systematic review of the comprehensive search date on the theme (considering delay in  
5 indexing) to nowadays. The search for eligible studies will be accomplished by  
6 systematic research of database, namely Lilacs, CINAHL, EMBASE, MEDLINE,  
7 AMED, Web of Science, Clinical Trials and Cochrane Central Registry of Controlled  
8 Trials, with a defined search strategy, free of idiom restriction.  
9  
10  
11  
12

13  
14 We shall combine the main terms “Chronic Pain” and “Acupuncture” indexed in  
15 the MeSH system. Firstly, we will search the isolate terms and their synonyms, and then  
16 we will make a second search, combining and crossing the terms. Appendix A, Table 1.  
17  
18  
19

20  
21 We will verify the reference or citation list found in secondary studies to identify  
22 possibly eligible studies. When necessary, we shall contact the authors of the main  
23 studies to obtain further information.  
24  
25  
26

### 27 **Study Eligibility Criteria**

28  
29  
30 The eligibility criteria for this study will be the same as those adopted in the  
31 systematic review published in 2012.  
32

33  
34 Design: controlled randomized clinical trials, whose patient recruitment occurred  
35 from September 2004 and whose number of patients is equal or more than 100.  
36

37  
38 Clinical condition: studies which include patients aged 18 or older, with non-  
39 oncologic chronic pain. Eligible pain conditions: Osteoarthritis, chronic or recurrent  
40 headaches, specific and nonspecific shoulder pains, and nonspecific back or neck pain.  
41 For osteoarthritis or headaches, it will not be necessary the duration of the pain, since  
42 both are of a chronic nature. For pain in the shoulder, back and neck, the pain episode  
43 should be at least four weeks in duration.  
44  
45  
46

47  
48 Intervention: the studies should include a group of patients treated with  
49 acupuncture, where acupuncture points or trigger points were stimulated with  
50 acupuncture needles, and another group where patients were treated with sham  
51 acupuncture or no acupuncture, and studies where the choice blinding is unmistakable  
52 and adequate.  
53  
54  
55  
56  
57  
58  
59  
60

1  
2  
3 *Exclusion Criteria:* The following trials are to be excluded: neck or back pains  
4 associated with specific clinical conditions (e.g., fractures resulting from osteoporosis).  
5  
6

### 7 **Determination of Eligibility**

8  
9 Two reviewers, in pairs, will evaluate independently whether summaries and  
10 titles are according to the eligibility criteria. Differences are to be solved by consensus  
11 among all reviewers. To assess the agreement of the selection we will use Kappa Test,  
12 given that kappa values between 0,40 and 0,59 are to be considered weak agreement,  
13 between 0,60 and 0,74 medium agreement, and 0,75 or more excellent agreement.  
14  
15  
16  
17

18  
19 In order to exclude doubled articles, one reviewer will analyze all the eligible  
20 articles and identify those which have one or more authors in common. In case of  
21 doubled publication, we will use the article with most complete data.  
22  
23  
24

### 25 **Data Extraction**

26  
27 We will adopt an Excel spreadsheet for the abstraction of data, to be used by two  
28 reviewers separately. A third reviewer will check the Excel spreadsheet to ensure the  
29 coherence of the answers obtained among collaborators and use the consensus when  
30 necessary.  
31  
32  
33

34 For articles published only in summary or for those with important information  
35 missing, we will look for complete information about methods and results by contacting  
36 the authors.  
37  
38

39 Two reviewers will be calibrated by the extraction of at least three articles and  
40 next, will perform the consensus, in pairs and independently. This procedure shall occur  
41 until reviewers are able to extract the data. The collected data will be: name of the first  
42 author, date of publication, country of origin, impact of the journal, recruitment date of  
43 the first participant, presence of outcome domains IMMPACT, and the tools used for  
44 measuring the outcome domains, method of acupuncture, clinical condition of the  
45 patient, duration of treatment. Besides this, the study will check if fundamental  
46 outcomes are reported by the patient (ORP), if clinical outcomes are reported (COR), if  
47 the outcome was reported by a third person (ORT), or a combination of the items above.  
48  
49  
50  
51  
52  
53  
54  
55  
56  
57  
58  
59  
60

1  
2  
3 The data will be recorded to be transferred to a statistical analysis program later.  
4 A regression analysis will be conducted to explore factors that may be associated with  
5 the presence of outcome domains according to IMMPACT recommendations.  
6  
7  
8

### 9 **Risk of Bias**

10 A modified version of Cochrane for risk of bias will be used. [14 17] Reviewers  
11 will evaluate the risk of bias for each randomized trial independently, according to the  
12 following criteria: generation of random sequence, hiding of the choices, blinding of  
13 participants and professionals, blinding of outcome evaluators, if outcomes were  
14 reported adequately; incomplete outcomes; selective outcome reporting and other  
15 sources of bias. Reviewers will attribute answer alternatives “definitely yes”, “probably  
16 yes”, “probably not” and “definitely not” for each of the domains. [18] Ultimately,  
17 “definitely yes” and “probably yes” will be attributed low risk of bias, whereas  
18 “definitely not” and “probably not” mean high risk of bias. Reviewers will solve  
19 divergences through discussion, and a third person will judge unsolved divergences.  
20  
21  
22  
23  
24  
25  
26  
27  
28

### 29 **Definitions of IMMPACT outcome domain**

30 The four IMMPACT domains recommended in 2003 and 2008 which will be  
31 captured in this study are listed below, together with their definitions  
32  
33

34 1. Pain: Includes various aspects of pain evaluation (e.g., intensity of pain,  
35 duration and frequency). The global evaluation of pain is a general assessment which  
36 examines how the pain changed during the treatment.  
37  
38

39 2. Physical function: refers to the participant’s capacity to conduct their daily  
40 activities (e.g., tasks, walks, trips and self-care), strength and resistance.  
41  
42

43 3. Emotional state: refers to the treatment associated to emotional anguish (e.g.,  
44 depression, anxiety, anger or irritability).  
45  
46

47 4. Patient’s classification of improvement and satisfaction with the treatment:  
48 refers to the participant’s feeling with the treatment (that is, if they feel the positive  
49 features of the treatment surpass the negative ones). This domain overcomes pain  
50 classification only.  
51

52 Thereafter, for each domain, the measurement method is quantized, that is,  
53 whether the pain was measured by VAS and / or VAN, whether physical function was  
54 measured by multidimensional inventory to pain and / or inventory summary of the  
55 pain, whether the emotional state was measured by the Beck depression inventory and /  
56  
57  
58  
59  
60

1  
2  
3 or mood state profile, and whether the improvement in patient satisfaction was  
4 measured by the patient's overall impression of change. The correct applicability of the  
5 instrument will also be quantified (if the domain report was executed by the patient,  
6 clinical or third parties).  
7  
8  
9

### 10 11 **Statistical Analysis** 12

13  
14 The statistical analyzes carried out in this survey will aim to identify the factors  
15 associated with the change in reporting or adherence to the IMMPACT  
16 recommendations, in RCT made since its publication.  
17

18  
19 The descriptive part includes year of publication, place of study, factor of impact  
20 of the journal and items of evaluation of methodological quality. These factors will be  
21 highlighted as they may influence the adherence of the IMMPACT recommendations.  
22 Afterwards, the frequency of measurement of pain, physical function, emotional state  
23 and patient satisfaction improvement will be described according to the IMMPACT  
24 recommendations.  
25  
26  
27  
28

29 Compliance with IMMPACT will be measured by the attendance of the four  
30 main domains. It is also planned to quantify the number of IMMPACT domains that  
31 will be served, in order to generate a score between 0-4 points. The score will be  
32 described on average, standard deviation, median and interquartile range.  
33  
34

35  
36 A score of 0 will be given when the study does not report any of the domains  
37 recommended by IMMPACT, score 1, when reporting only one of the recommended  
38 domains; Score 2 when reporting two of the recommended domains; Score 3, when  
39 reporting three of the recommended domains; and score 4 when reporting the four major  
40 domains recommended by IMMPACT.  
41  
42  
43

44 The factors associated with compliance with the areas of IMMPACT will be  
45 investigated. For this, a logistic regression will be performed considering the domains  
46 of IMMPACT as dependent variables and the characteristics of the study as independent  
47 variables (year of publication, place of study, periodic impact factor and items of  
48 methodological quality evaluation). For a good regression analysis, a minimum of 10  
49 references is necessary, which will not be a problem since we will include previous SR  
50 studies. The results will be expressed in Odds Ratio with respective 95% confidence  
51 intervals.  
52  
53  
54  
55  
56  
57  
58  
59  
60

1  
2  
3 Factors associated with the IMMPACT score will also be investigated.  
4 Depending on the data distribution, analysis of variance (ANOVA) or Kruskal Wallis  
5 will be performed. All analyses were 2-sided tests at a significance level of 0.05.  
6  
7

8 All calculations will run in STATA 14.2.  
9

## 10 11 **DISCUSSION**

12  
13  
14 Our survey will evaluate methodologically the outcomes of RCT which used  
15 acupuncture for NOCP. We will check whether methodological quality of outcome  
16 reporting in published trials have used IMMPACT recommendations in measuring  
17 CRCT-NOCP outcomes when acupuncture was used as a treatment. Our survey's  
18 outcomes will be significant for public health and for health professionals all over the  
19 world, mainly in Brazil.  
20  
21

22  
23  
24 Since the publication of IMMPACT, it is not known whether studies using  
25 acupuncture as an intervention for chronic pain follow IMMPACT's recommendations.  
26 Without consistent and more thorough standard outcome reports for patients in CRCT  
27 and NOCP, the authors of such studies will be unable to judge objectively the effects of  
28 acupuncture. The data compiled on the use of acupuncture will inform both patients and  
29 health professionals about its efficacy and safety. Therefore, multiprofessional care and  
30 decision-making based on evidence will be made easier.  
31  
32

33  
34  
35 This Project aims at exploring some hypotheses to determine the use of  
36 IMMPACT recommendations on CRCT-NOCP. After the publication of IMMPACT  
37 orientations in August 2003 and later, in 2008, CRCT-NOCP which started recruiting  
38 participants as from September 2004 had better reports of main outcomes, regarding  
39 IMMPACT domains versus journals with lower impact factors. The main domains were  
40 reported by the patient, by the clinician, by a third person or by a combination of these  
41 subjects.  
42  
43  
44  
45  
46  
47

## 48 49 **ETHICS AND DIFUSION**

50  
51  
52 Ethics is not necessary, as this is protocol for a methodological survey. The  
53 survey will be published in a journal and presented in congresses with reviews by peers.  
54 The evidence of this study will allow health professionals to verify the efficacy and  
55  
56  
57  
58  
59  
60

1  
2  
3 safety of acupuncture for the treatment of NOCP. Updates of this study should be  
4 conducted to inform and orient the practice of health care.  
5

6 **Contributors:** LCL is the main researcher who led the writing of the  
7 manuscript. CCB and LGM are the project manager, co-researcher, who contributed to  
8 and writing and review of the manuscript. MTS is co-researcher, and contributed to the  
9 writing and review of the manuscript. All the authors have read and approved of the  
10 final manuscript.  
11

12 **Acknowledgments:** The authors thank Dr. Caio Guimarães for his expert  
13 advice.  
14

15 **Sponsorship:** This Project has not received any specific funding of any public,  
16 private or non-profit agency.  
17

18 **Interest conflict:** None.  
19  
20  
21  
22  
23  
24  
25  
26  
27  
28  
29  
30  
31  
32  
33  
34  
35  
36  
37  
38  
39  
40  
41  
42  
43  
44  
45  
46  
47  
48  
49  
50  
51  
52  
53  
54  
55  
56  
57  
58  
59  
60



## REFERENCES

1. Ontario RNAo. Assessment and management of pain. 3<sup>a</sup> ed. Dez/2013 ed. Rockville MD: Agency for Healthcare Research and Quality (AHRQ), 2013.
2. SIGN SIGN. Management of chronic pain. A national clinical guideline. Secondary Management of chronic pain. A national clinical guideline 2013. <http://www.guideline.gov/content.aspx?id=47707&search=chronic+pain>.
3. Rasu RS, Vouthy K, Crowl AN, et al. Cost of pain medication to treat adult patients with nonmalignant chronic pain in the United States. *Journal of managed care & specialty pharmacy* 2014;**20**(9):921-8 doi: 10.18553/jmcp.2014.20.9.921[published Online First: Epub Date]].
4. Guerriere DN, Choiniere M, Dion D, et al. The Canadian STOP-PAIN project - Part 2: What is the cost of pain for patients on waitlists of multidisciplinary pain treatment facilities? *Canadian journal of anaesthesia = Journal canadien d'anesthesie* 2010;**57**(6):549-58 doi: 10.1007/s12630-010-9306-4[published Online First: Epub Date]].
5. Azevedo LF, Costa-Pereira A, Mendonca L, Dias CC, Castro-Lopes JM. The economic impact of chronic pain: a nationwide population-based cost-of-illness study in Portugal. *The European journal of health economics : HEPAC : health economics in prevention and care* 2016;**17**(1):87-98 doi: 10.1007/s10198-014-0659-4[published Online First: Epub Date]].
6. Brasil. Política Nacional de Práticas Integrativas e Complementares no SUS. Ministério da Saúde 2006;**DOU – seção 1**
7. Salud OMDI. Estrategia de la OMS sobre medicina tradicional 2014-2023. 2013
8. Ontario CoPaSo. Evidence-based recommendations for medical management of chronic non-malignant pain. . CPSO 2000
9. Practice guidelines for chronic pain management: an updated report by the American Society of Anesthesiologists Task Force on Chronic Pain Management and the American Society of Regional Anesthesia and Pain Medicine. *Anesthesiology* 2010;**112**(4):810-33
10. National Guideline C. Assessment and management of chronic pain. Secondary Assessment and management of chronic pain 2011. <http://www.guideline.gov/content.aspx?id=47646&search=assessment+and+mangement+of+chronic+pain>.
11. Dworkin RH, Turk DC, Peirce-Sandner S, et al. Research design considerations for confirmatory chronic pain clinical trials: IMMPACT recommendations. *Pain* 2010;**149**(2):177-93 doi: 10.1016/j.pain.2010.02.018[published Online First: Epub Date]].
12. Turk DC, Dworkin RH, Allen RR, et al. Core outcome domains for chronic pain clinical trials: IMMPACT recommendations. *Pain* 2003;**106**(3):337-45
13. Dworkin RH, Turk DC, Farrar JT, et al. Core outcome measures for chronic pain clinical trials: IMMPACT recommendations. *Pain* 2005;**113**(1-2):9-19 doi: 10.1016/j.pain.2004.09.012[published Online First: Epub Date]].
14. Higgins JP GS. *Cochrane handbook for systematic reviews of interventions*, version [5.1.0](updated March 2011). The Cochrane Collaboration 2011
15. Santos CMdC, Pimenta CAdM, Nobre MRC. The PICO strategy for the research question construction and evidence search. *Revista Latino-Americana de Enfermagem* 2007;**15**:508-11



- 1
- 2
- 3
- 4 16. Vickers AJ, Cronin AM, Maschino AC, et al. Acupuncture for chronic pain:  
5 individual patient data meta-analysis. Archives of internal medicine  
6 2012;**172**(19):1444-53 doi: 10.1001/archinternmed.2012.3654[published  
7 Online First: Epub Date]].
- 8 17. Akl EA, Sun X, Busse JW, et al. Specific instructions for estimating unclearly  
9 reported blinding status in randomized trials were reliable and valid. Journal of  
10 clinical epidemiology 2012;**65**(3):262-7 doi:  
11 10.1016/j.jclinepi.2011.04.015[published Online First: Epub Date]].
- 12 18. Busse J, Guyatt G. Modification of Cochrane Tool to assess risk of bias in  
13 randomized trials. , 2013.
- 14
- 15
- 16
- 17
- 18
- 19
- 20
- 21
- 22
- 23
- 24
- 25
- 26
- 27
- 28
- 29
- 30
- 31
- 32
- 33
- 34
- 35
- 36
- 37
- 38
- 39
- 40
- 41
- 42
- 43
- 44
- 45
- 46
- 47
- 48
- 49
- 50
- 51
- 52
- 53
- 54
- 55
- 56
- 57
- 58
- 59
- 60

## Appendix A

Table 1. Search Strategy for database

Database: Ovid MEDLINE(R) In-Process & Other Non-Indexed Citations, Ovid MEDLINE(R) Daily and Ovid MEDLINE(R) <1946 to Present>

Search Strategy:

1 exp Acupuncture Analgesia/  
 2 exp Acupuncture/  
 3 acupuncture.mp.  
 4 1 OR 2 OR 3  
 5 chronic pain.mp.  
 6 exp Chronic Pain/  
 7 exp Chronic Disease/  
 8 5 OR 6 OR 7  
 9 4 AND 8

Database: Embase <1974 to 2016 June 28>

Search Strategy:

1 exp acupuncture analgesia/  
 2 acupuncture.mp.  
 3 exp acupuncture/  
 4 1 OR 2 OR 3  
 5 exp chronic pain/  
 6 chronic pain.mp.  
 7 5 OR 6  
 8 4 AND 7

Database: AMED (Allied and Complementary Medicine) <1985 to June 2016>

Search Strategy:

1 acupuncture.mp.  
 2 exp Acupuncture/  
 3 1 OR 2  
 4 exp Chronic disease/  
 5 chronic pain.mp.  
 6 4 OR 5  
 7 3 AND 6

Database: CINAHL

Search Strategy:

1 (MH "Acupuncture+")  
 2 (MH "Acupuncture Analgesia")  
 3 1 OR 2  
 4 (MH "Chronic Pain")  
 5 3 AND 4

Database: Cochrane Library

Search Strategy:

1 "acupuncture":ti,ab,kw  
 2 "acupuncture analgesia":ti,ab,kw

1  
2  
3 1 OR 2  
4 "chronic pain":ti,ab,kw  
5 3 AND 4  
6  
7

8 Database: Web of Science <1976 to July 2016>

9 Search Strategy:

10 1 acupuncture  
11 2 \*acupuncture\*  
12 3 1 OR 2  
13 4 chronic pain  
14 5 chronic \*pain\*  
15 6 4 OR 5  
16 7 3 AND 6  
17  
18  
19  
20  
21  
22  
23  
24  
25  
26  
27  
28  
29  
30  
31  
32  
33  
34  
35  
36  
37  
38  
39  
40  
41  
42  
43  
44  
45  
46  
47  
48  
49  
50  
51  
52  
53  
54  
55  
56  
57  
58  
59  
60

## PRISMA-P 2015 Checklist

This checklist has been adapted for use with protocol submissions to *Systematic Reviews* from Table 3 in Moher D et al: Preferred reporting items for systematic review and meta-analysis protocols (PRISMA-P) 2015 statement. *Systematic Reviews* 2015 4:1

| Section/topic                     | #  | Checklist item                                                                                                                                                                                  | Information reported     |                          | Page number(s) |
|-----------------------------------|----|-------------------------------------------------------------------------------------------------------------------------------------------------------------------------------------------------|--------------------------|--------------------------|----------------|
|                                   |    |                                                                                                                                                                                                 | Yes                      | No                       |                |
| <b>ADMINISTRATIVE INFORMATION</b> |    |                                                                                                                                                                                                 |                          |                          |                |
| <b>Title</b>                      |    |                                                                                                                                                                                                 |                          |                          |                |
| Identification                    | 1a | Identify the report as a protocol of a systematic review                                                                                                                                        | <input type="checkbox"/> |                          | 1              |
| Update                            | 1b | If the protocol is for an update of a previous systematic review, identify as such                                                                                                              |                          |                          | not applicable |
| <b>Registration</b>               | 2  | If registered, provide the name of the registry (e.g., PROSPERO) and registration number in the Abstract                                                                                        |                          |                          | not applicable |
| <b>Authors</b>                    |    |                                                                                                                                                                                                 |                          |                          |                |
| Contact                           | 3a | Provide name, institutional affiliation, and e-mail address of all protocol authors; provide physical mailing address of corresponding author                                                   | <input type="checkbox"/> |                          | 1              |
| Contributions                     | 3b | Describe contributions of protocol authors and identify the guarantor of the review                                                                                                             | <input type="checkbox"/> |                          | 10             |
| <b>Amendments</b>                 | 4  | If the protocol represents an amendment of a previously completed or published protocol, identify as such and list changes; otherwise, state plan for documenting important protocol amendments |                          | <input type="checkbox"/> | not applicable |
| <b>Support</b>                    |    |                                                                                                                                                                                                 |                          |                          |                |
| Sources                           | 5a | Indicate sources of financial or other support for the review                                                                                                                                   | <input type="checkbox"/> |                          | 10             |
| Sponsor                           | 5b | Provide name for the review funder and/or sponsor                                                                                                                                               |                          | <input type="checkbox"/> | not applicable |
| Role of sponsor/funder            | 5c | Describe roles of funder(s), sponsor(s), and/or institution(s), if any, in developing the protocol                                                                                              |                          | <input type="checkbox"/> | not applicable |
| <b>INTRODUCTION</b>               |    |                                                                                                                                                                                                 |                          |                          |                |
| <b>Rationale</b>                  | 6  | Describe the rationale for the review in the context of what is already known                                                                                                                   | <input type="checkbox"/> |                          | 5              |
| <b>Objectives</b>                 | 7  | Provide an explicit statement of the question(s) the review will address with reference to participants, interventions, comparators, and outcomes (PICO)                                        | <input type="checkbox"/> |                          | 5              |

| Section/topic                             | #   | Checklist item                                                                                                                                                                                                                              | Information reported     |    | Page number(s) |
|-------------------------------------------|-----|---------------------------------------------------------------------------------------------------------------------------------------------------------------------------------------------------------------------------------------------|--------------------------|----|----------------|
|                                           |     |                                                                                                                                                                                                                                             | Yes                      | No |                |
| <b>METHODS</b>                            |     |                                                                                                                                                                                                                                             |                          |    |                |
| <b>Eligibility criteria</b>               | 8   | Specify the study characteristics (e.g., PICO, study design, setting, time frame) and report characteristics (e.g., years considered, language, publication status) to be used as criteria for eligibility for the review                   | <input type="checkbox"/> |    | 5, 6           |
| <b>Information sources</b>                | 9   | Describe all intended information sources (e.g., electronic databases, contact with study authors, trial registers, or other grey literature sources) with planned dates of coverage                                                        | <input type="checkbox"/> |    | 5, 6           |
| <b>Search strategy</b>                    | 10  | Present draft of search strategy to be used for at least one electronic database, including planned limits, such that it could be repeated                                                                                                  | <input type="checkbox"/> |    | 5, 6           |
| <b>STUDY RECORDS</b>                      |     |                                                                                                                                                                                                                                             |                          |    |                |
| Data management                           | 11a | Describe the mechanism(s) that will be used to manage records and data throughout the review                                                                                                                                                | <input type="checkbox"/> |    | 7              |
| Selection process                         | 11b | State the process that will be used for selecting studies (e.g., two independent reviewers) through each phase of the review (i.e., screening, eligibility, and inclusion in meta-analysis)                                                 | <input type="checkbox"/> |    | 7              |
| Data collection process                   | 11c | Describe planned method of extracting data from reports (e.g., piloting forms, done independently, in duplicate), any processes for obtaining and confirming data from investigators                                                        | <input type="checkbox"/> |    | 7              |
| <b>Data items</b>                         | 12  | List and define all variables for which data will be sought (e.g., PICO items, funding sources), any pre-planned data assumptions and simplifications                                                                                       | <input type="checkbox"/> |    | 7              |
| <b>Outcomes and prioritization</b>        | 13  | List and define all outcomes for which data will be sought, including prioritization of main and additional outcomes, with rationale                                                                                                        | <input type="checkbox"/> |    | 7,8            |
| <b>Risk of bias in individual studies</b> | 14  | Describe anticipated methods for assessing risk of bias of individual studies, including whether this will be done at the outcome or study level, or both; state how this information will be used in data synthesis                        | <input type="checkbox"/> |    | 7              |
| <b>DATA</b>                               |     |                                                                                                                                                                                                                                             |                          |    |                |
| <b>Synthesis</b>                          | 15a | Describe criteria under which study data will be quantitatively synthesized                                                                                                                                                                 | <input type="checkbox"/> |    | 8, 9           |
|                                           | 15b | If data are appropriate for quantitative synthesis, describe planned summary measures, methods of handling data, and methods of combining data from studies, including any planned exploration of consistency (e.g., $I^2$ , Kendall's tau) | <input type="checkbox"/> |    | 8, 9           |
|                                           | 15c | Describe any proposed additional analyses (e.g., sensitivity or subgroup analyses, meta-regression)                                                                                                                                         | <input type="checkbox"/> |    | 9              |
|                                           | 15d | If quantitative synthesis is not appropriate, describe the type of summary planned                                                                                                                                                          | <input type="checkbox"/> |    | 9              |

| Section/topic                     | #  | Checklist item                                                                                                              | Information reported     |                          | Page number(s) |
|-----------------------------------|----|-----------------------------------------------------------------------------------------------------------------------------|--------------------------|--------------------------|----------------|
|                                   |    |                                                                                                                             | Yes                      | No                       |                |
| Meta-bias(es)                     | 16 | Specify any planned assessment of meta-bias(es) (e.g., publication bias across studies, selective reporting within studies) | <input type="checkbox"/> |                          | 7, 8           |
| Confidence in cumulative evidence | 17 | Describe how the strength of the body of evidence will be assessed (e.g., GRADE)                                            |                          | <input type="checkbox"/> | not applicable |
