# Supplementary material for: Use of IMMPACT domains in clinical trials of acupuncture for chronic pain: a protocol for a methodological survey
Source: PubMed Central journal article supplement — BMJ Open. 2017 Sep 27;7(9):e014904. doi: 10.1136/bmjopen-2016-014904 (PMC5623415; doi:10.1136/bmjopen-2016-014904), 2017-09-27
Supplement: bmjopen-2016-014904supp001.pdf [file bmjopen-2016-014904supp001.pdf]

## Appendix A

**Table 1. Search Strategy for database**

Database: Ovid MEDLINE(R) In-Process & Other Non-Indexed Citations, Ovid MEDLINE(R) Daily and Ovid MEDLINE(R) <1946 to Present>

Search Strategy:

1 exp Acupuncture Analgesia/  
2 exp Acupuncture/  
3 acupuncture.mp.  
4 1 OR 2 OR 3  
5 chronic pain.mp.  
6 exp Chronic Pain/  
7 exp Chronic Disease/  
8 5 OR 6 OR 7  
9 4 AND 8

Database: Embase <1974 to 2016 June 28>

Search Strategy:

1 exp acupuncture analgesia/  
2 acupuncture.mp.  
3 exp acupuncture/  
4 1 OR 2 OR 3  
5 exp chronic pain/  
6 chronic pain.mp.  
7 5 OR 6  
8 4 AND 7

Database: AMED (Allied and Complementary Medicine) <1985 to June 2016>

Search Strategy:

1 acupuncture.mp.  
2 exp Acupuncture/  
3 1 OR 2  
4 exp Chronic disease/  
5 chronic pain.mp.  
6 4 OR 5  
7 3 AND 6

Database: CINAHL

Search Strategy:

1 (MH "Acupuncture+")  
2 (MH "Acupuncture Analgesia")  
3 1 OR 2  
4 (MH "Chronic Pain")  
5 3 AND 4

Database: Cochrane Library

Search Strategy:

1 "acupuncture":ti,ab,kw  
2 "acupuncture analgesia":ti,ab,kw

3 1 OR 2  
4 "chronic pain":ti,ab,kw  
5 3 AND 4

Database: Web of Science <1976 to July 2016>

Search Strategy:

1 acupuncture  
2 \*acupuncture\*  
3 1 OR 2  
4 chronic pain  
5 chronic \*pain\*  
6 4 OR 5  
7 3 AND 6
